# Supplementary material for: Seasonal variation and origins of volatile organic compounds observed during 2 years at a western Mediterranean remote background site (Ersa, Cape Corsica)
Source: Copernicus journal article supplement (doi:10.5194/acp-21-1449-2021), 2021-02-03
Supplement: Supplementary file 1 [file acp-21-1449-2021-supplement.pdf]

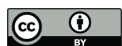

## *Supplement of*

# **Seasonal variation and origins of volatile organic compounds observed during 2 years at a western Mediterranean remote background site (Ersa, Cape Corsica)**

**Cécile Debevec et al.**

*Correspondence to:* Stéphane Sauvage ([stephane.sauvage@imt-lille-douai.fr](mailto:stephane.sauvage@imt-lille-douai.fr))  
and Cécile Debevec ([cecile.debevec@imt-lille-douai.fr](mailto:cecile.debevec@imt-lille-douai.fr))

The copyright of individual parts of the supplement might differ from the CC BY 4.0 License.

**Table S1: Average concentrations  $\pm$  standard deviations ( $\mu\text{g m}^{-3}$ ) of selected VOCs measured at Ersra from June 2012 to June 2014 as a function of the measurement sampling time (see Table 1).**

|                                | Species                              | Samples collected<br>from 09:00-13:00 | Samples collected<br>from 12:00-16:00 |
|--------------------------------|--------------------------------------|---------------------------------------|---------------------------------------|
| <b>BVOCs</b>                   | <b>Isoprene</b>                      | $0.08 \pm 0.21$                       | $0.21 \pm 0.35$                       |
|                                | <b><math>\alpha</math>-Pinene</b>    | $0.13 \pm 0.11$                       | $0.49 \pm 0.71$                       |
|                                | <b>Camphene</b>                      | $0.01 \pm 0.03$                       | $0.03 \pm 0.07$                       |
|                                | <b><math>\alpha</math>-Terpinene</b> | $0.02 \pm 0.03$                       | $0.09 \pm 0.18$                       |
|                                | <b>Limonene</b>                      | $0.08 \pm 0.17$                       | $0.24 \pm 0.34$                       |
| <b>Anthropogenic<br/>NMHCs</b> | <b>Ethane</b>                        | $2.43 \pm 0.70$                       | $1.57 \pm 0.80$                       |
|                                | <b>Propane</b>                       | $1.28 \pm 0.62$                       | $0.81 \pm 0.62$                       |
|                                | <b>i-Butane</b>                      | $0.36 \pm 0.25$                       | $0.19 \pm 0.16$                       |
|                                | <b>n-Butane</b>                      | $0.51 \pm 0.29$                       | $0.31 \pm 0.25$                       |
|                                | <b>i-Pentane</b>                     | $0.32 \pm 0.26$                       | $0.26 \pm 0.22$                       |
|                                | <b>n-Pentane</b>                     | $0.27 \pm 0.28$                       | $0.23 \pm 0.21$                       |
|                                | <b>n-Hexane</b>                      | $0.09 \pm 0.06$                       | $0.08 \pm 0.05$                       |
|                                | <b>Ethylene</b>                      | $0.38 \pm 0.20$                       | $0.30 \pm 0.18$                       |
|                                | <b>Propene</b>                       | $0.07 \pm 0.04$                       | $0.07 \pm 0.04$                       |
|                                | <b>Acetylene</b>                     | $0.31 \pm 0.20$                       | $0.25 \pm 0.27$                       |
|                                | <b>Benzene</b>                       | $0.35 \pm 0.16$                       | $0.30 \pm 0.22$                       |
|                                | <b>Toluene</b>                       | $0.37 \pm 0.26$                       | $0.30 \pm 0.24$                       |
|                                | <b>Ethylbenzene</b>                  | $0.06 \pm 0.07$                       | $0.05 \pm 0.07$                       |
|                                | <b>m,p-Xylenes</b>                   | $0.14 \pm 0.15$                       | $0.15 \pm 0.14$                       |
|                                | <b>o-Xylene</b>                      | $0.07 \pm 0.09$                       | $0.09 \pm 0.09$                       |
| <b>OVOCs</b>                   | <b>Formaldehyde</b>                  | $0.96 \pm 0.48$                       | $1.82 \pm 1.44$                       |
|                                | <b>Acetaldehyde</b>                  | $0.68 \pm 0.17$                       | $1.11 \pm 0.44$                       |
|                                | <b>i,n-Butanals</b>                  | $0.13 \pm 0.07$                       | $0.34 \pm 0.69$                       |
|                                | <b>n-Hexanal</b>                     | $0.15 \pm 0.10$                       | $0.26 \pm 0.32$                       |
|                                | <b>Benzaldehyde</b>                  | $0.15 \pm 0.12$                       | $0.15 \pm 0.12$                       |
|                                | <b>n-Octanal</b>                     | $0.07 \pm 0.05$                       | $0.13 \pm 0.24$                       |
|                                | <b>n-Nonanal</b>                     | $0.49 \pm 0.43$                       | $0.18 \pm 0.15$                       |
|                                | <b>n-Decanal</b>                     | $0.43 \pm 0.34$                       | $0.14 \pm 0.13$                       |
|                                | <b>n-Undecanal</b>                   | $0.09 \pm 0.06$                       | $0.06 \pm 0.06$                       |
|                                | <b>Glyoxal</b>                       | $0.07 \pm 0.04$                       | $0.07 \pm 0.05$                       |
|                                | <b>Methylglyoxal</b>                 | $0.07 \pm 0.04$                       | $0.21 \pm 0.16$                       |
|                                | <b>Acetone</b>                       | $3.32 \pm 1.77$                       | $4.84 \pm 2.95$                       |
|                                | <b>MEK</b>                           | $0.34 \pm 0.11$                       | $0.37 \pm 0.16$                       |

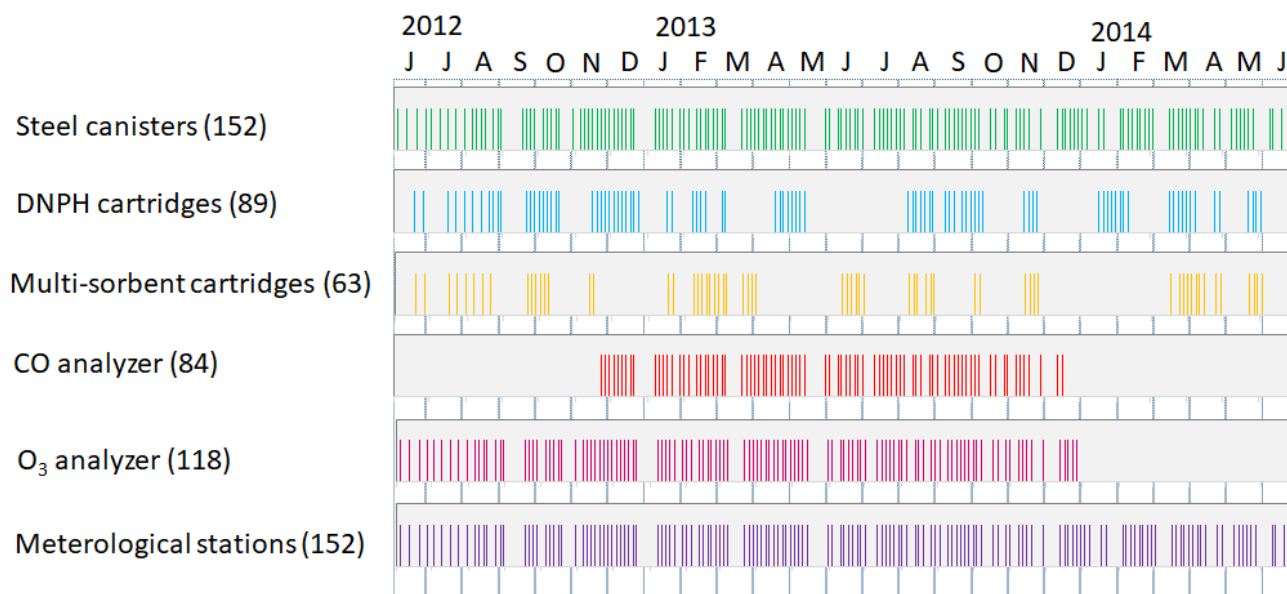

**Figure S1: Data collection status indicating when VOC samples were carried out over the two-year period and when concurrent ancillary measurements were realized. The numbers indicated within parentheses correspond to the total number of data observations.**

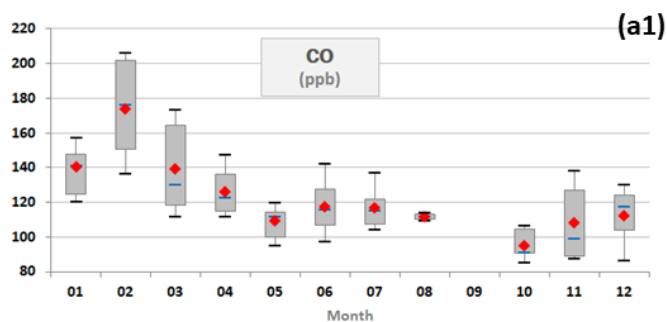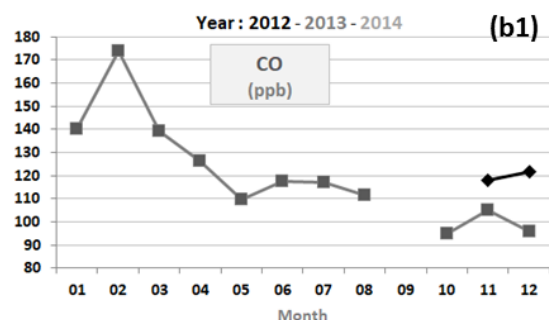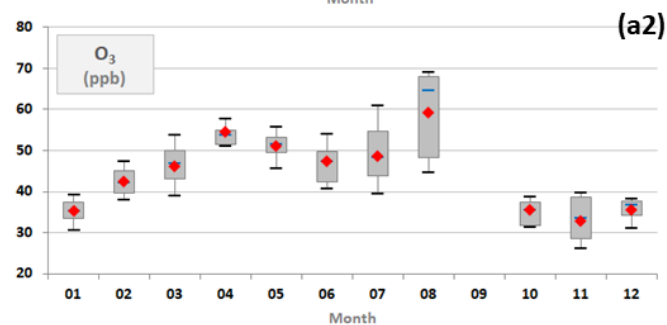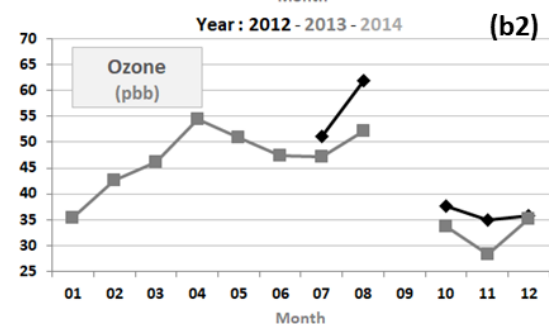

Figure S2: (a) Monthly variations in gas concentrations (CO and O<sub>3</sub> expressed in ppb) represented by box plots; the blue solid line, the red marker, and the box represent the median, the mean and the interquartile range of the values, respectively. The bottom and top of the box depict the first and third quartiles and the ends of the whiskers correspond to the first and ninth deciles. (b) Their monthly average concentrations as a function of the year. Note that gas data used in this study were restricted to periods when VOC measurements were realized (Sect. 2.2.2).

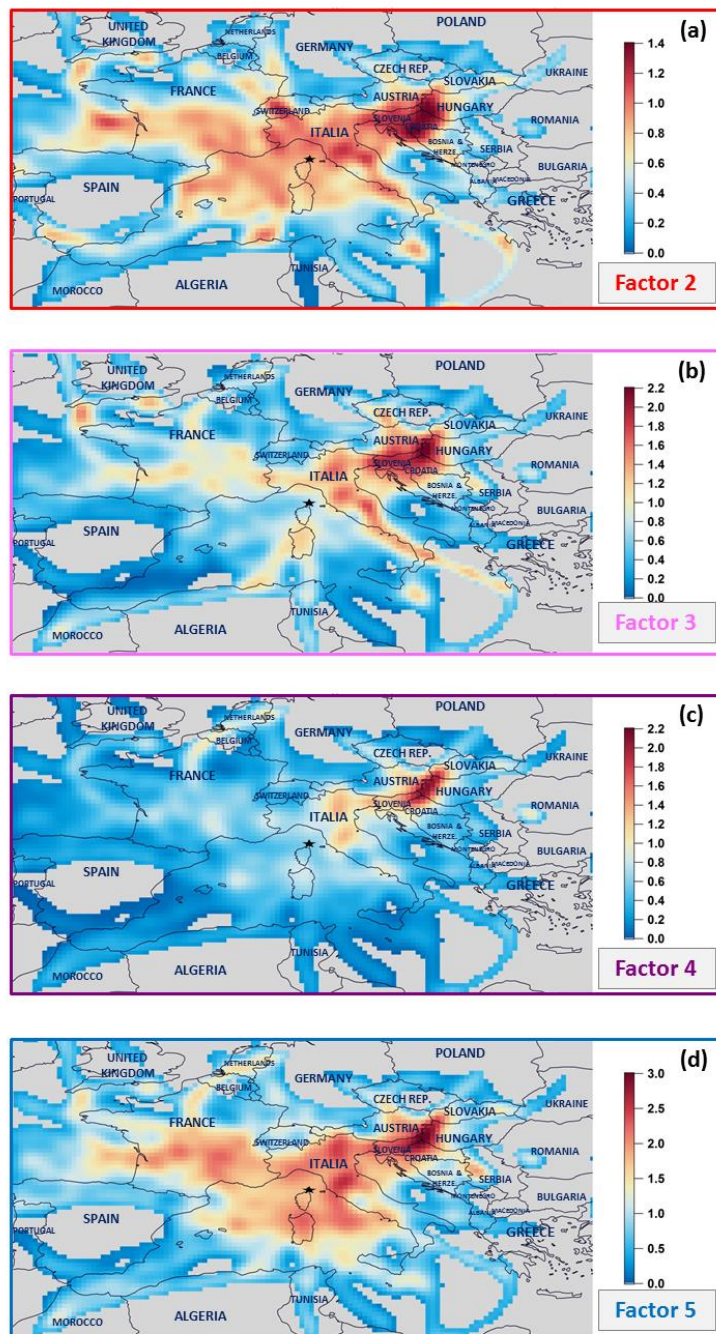

Figure S3: Potential emission area contributions to NMHC anthropogenic sources using the CF model. Contributions are expressed in  $\mu\text{g m}^{-3}$ . PMF factors: factor 2 - short-lived anthropogenic sources; factor 3 – evaporative sources; factor 4 – long-lived combustion sources; factor 5 – regional background.

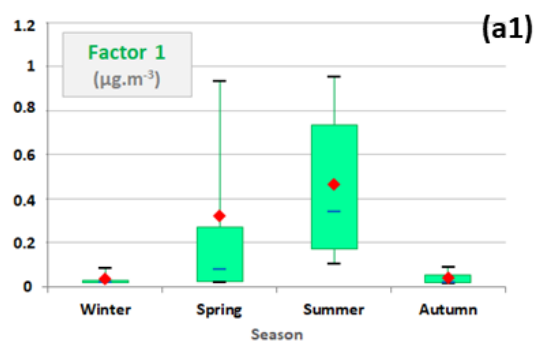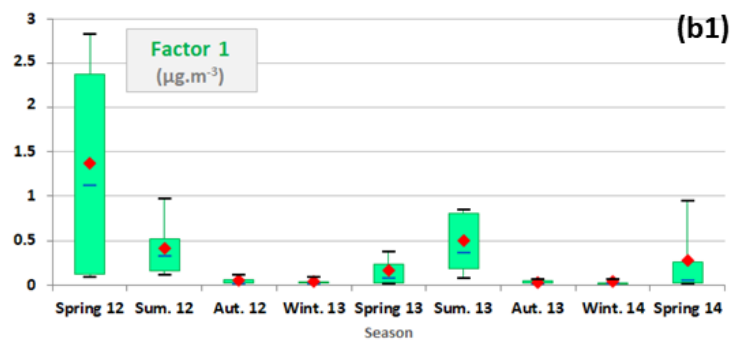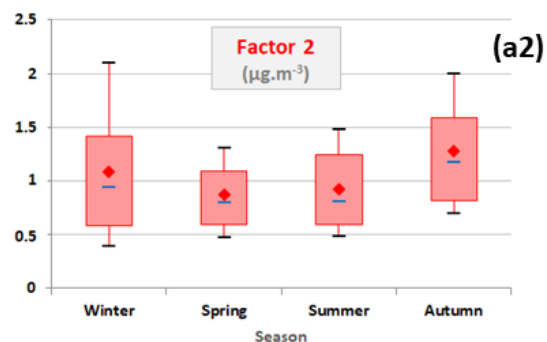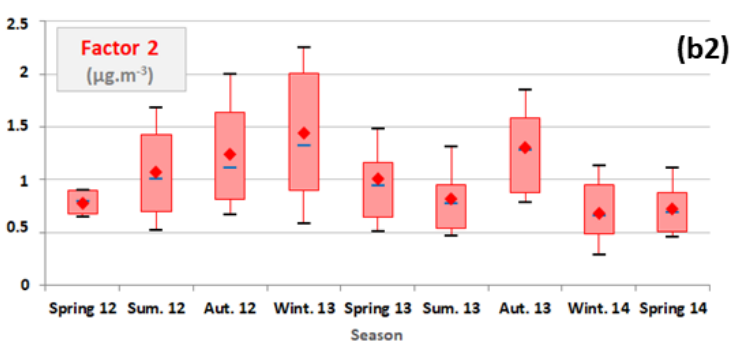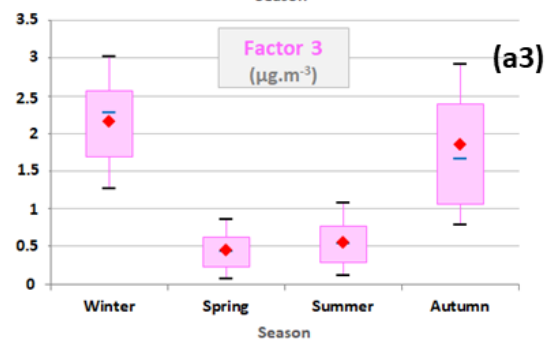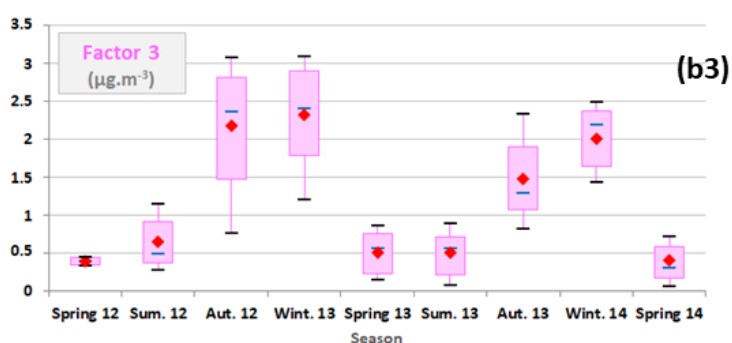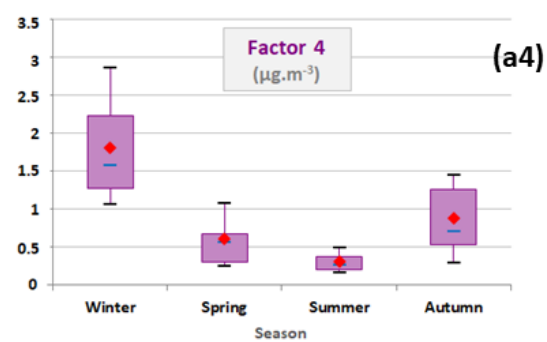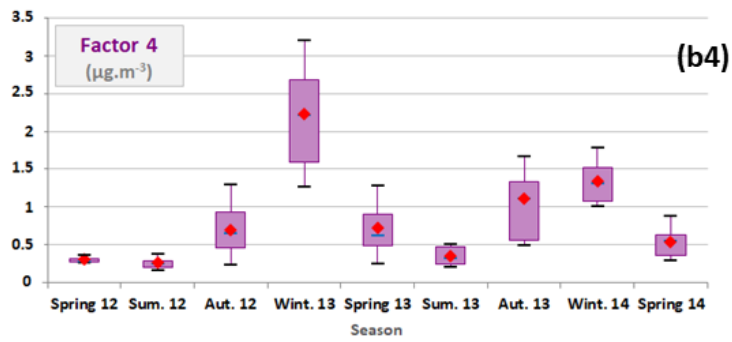

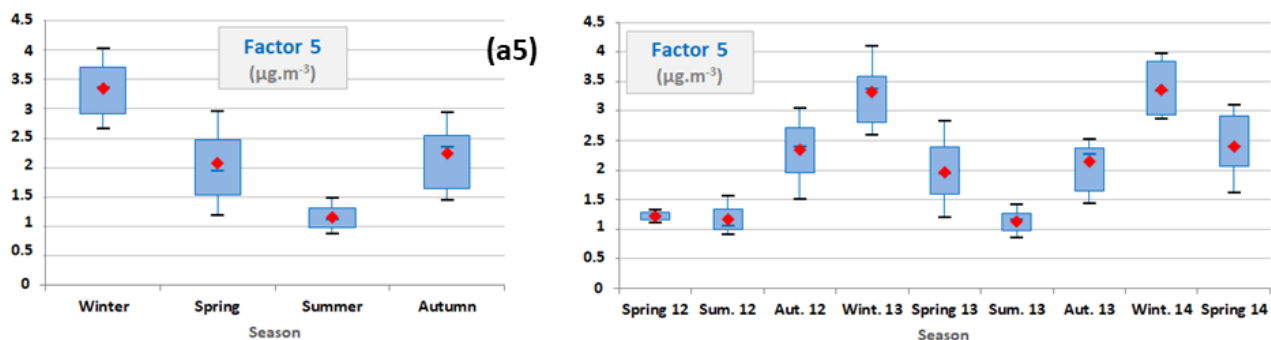

Figure S4: Seasonal (a) and interannual (b) variations in NMHC source contributions (expressed in  $\mu\text{g m}^{-3}$ ) represented by box plots; the blue solid line, the red marker, and the box represent the median, the mean, and the interquartile range of the values, respectively. The bottom and top of the box depict the first and third quartiles and the ends of the whiskers correspond to the first and ninth deciles. PMF factors: factor 1 - local biogenic source; factor 2 - short-lived anthropogenic sources; factor 3 – evaporative sources; factor 4 – long-lived combustion sources; factor 5 – regional background. Winter: 01/01-31/03 periods – spring: 01/04-30/06 periods – summer: 01/07-30/09 periods – autumn: 01/10-31/12 periods. Note that the NMHC dataset used for the PMF analysis included different sampling time hours (09:00-13:00 or 12:00-16:00) following shifts that occurred during the two-year period (see Table 1).

# Temperature anomalies (in °C)

## Winter 2013

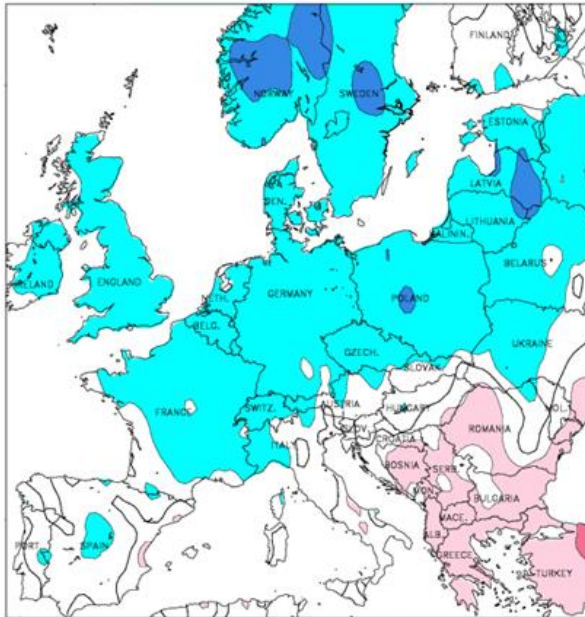

## January 2014

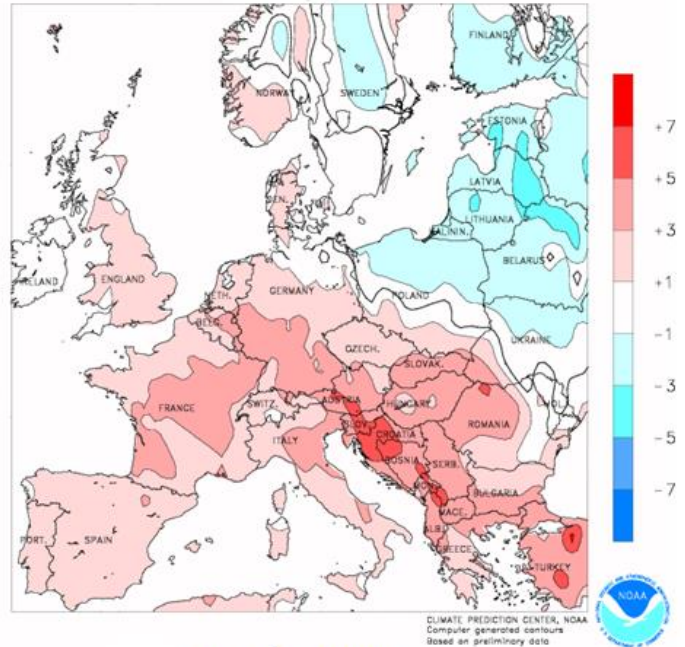

## February 2014

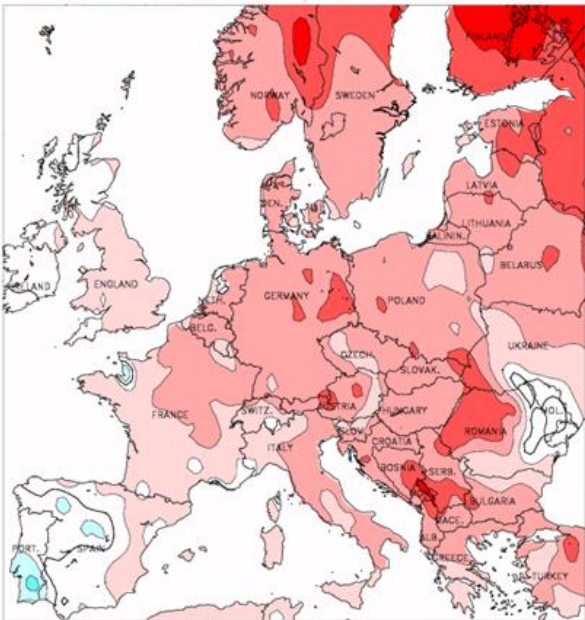

## March 2014

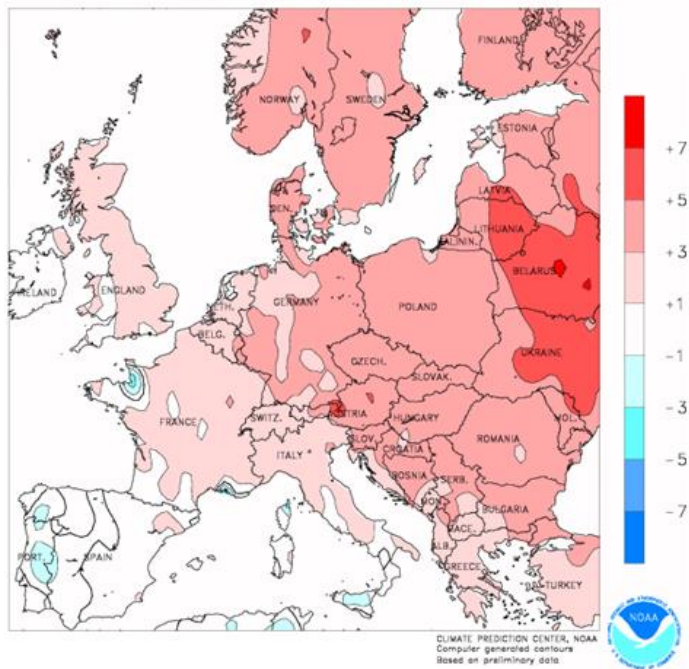

## Percent of normal precipitations

Winter 2013

Winter 2014

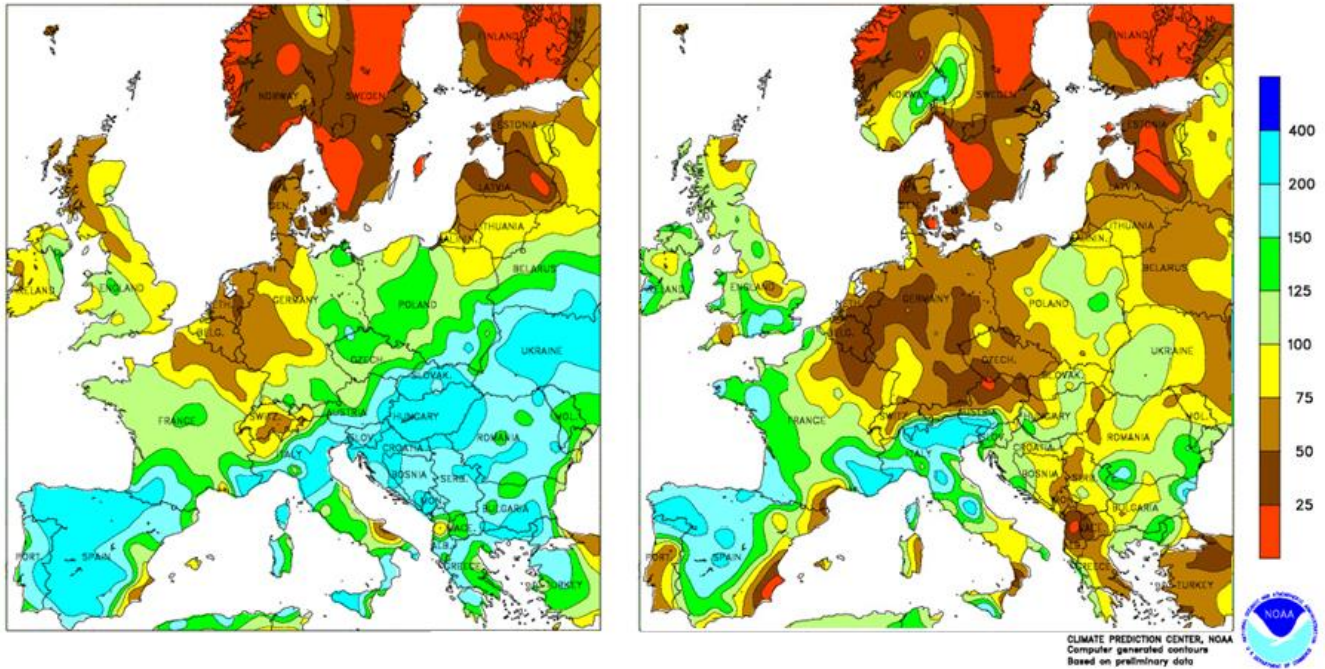

- 5 Figure S5: Normalized temperature anomalies and percent of precipitations in winters 2013 and 2014 in Continental Europe. Simulations realized by the Climate Prediction Center (CPC) of the National Oceanic and Atmospheric Administration (NOAA; [https://www.cpc.ncep.noaa.gov/products/analysis\\_monitoring/regional\\_monitoring/europe.html](https://www.cpc.ncep.noaa.gov/products/analysis_monitoring/regional_monitoring/europe.html), last access: 11/10/2020). Normalized values were calculated by the CPC using the average of monthly (or quarterly) values for the 1981-2010 period.

## Section S1: VOCs selected in this study

In this section, the selection of the VOCs retained for this study among those measured at Erse during the 2-yr period (see Table S2) is presented. Co-eluted VOCs, i.e. n-pentanal+o-tolualdehyde (measured from DNPH cartridges) and 2,3-dimethylbutane+cyclopentane (measured from multi-sorbent cartridges), were not considered in this study. Concentrations of b-pinene resulting from multi-sorbent cartridges were also not considered in this study for analytical reasons.

17 NMHCs were measured from both steel canisters and multi-sorbent cartridges (underlined species in Table S2) and n-hexanal was measured from both DNPH cartridges and multi-sorbent cartridges. Note that consistency between recovery species was checked during the intensive field campaign of summer 2013 (see Michoud et al., 2017) and was not checked a second time due to the low temporal recovery of the instruments in terms of data points. In this study, concentrations of the 17 NMHCs measured from steel canisters were selected given their higher number of observations and lower uncertainties compared to those measured with multi-sorbent cartridges. Concentrations of n-hexanal measured using DNPH cartridges were selected in this study for the same reason.

VOC percentages of values below their detection limit (DL) were then examined and VOCs having more than 50% of their concentrations below their DL were discarded. This criteria has concerned four NMHCs measured from steel canisters (2,2-dimethylbutane, i-octane, n-octane and 1,2,4-trimethylbenzene), one carbonyl compound measured from DNPH cartridges (acrolein) and seven VOCs measured from multi-sorbent cartridges (2-methylhexane, 2,2-dimethylpentane, 2,3-dimethylpentane, 2,4-dimethylpentane, 2,2,3-trimethylbutane, 2,3,4-trimethylpentane and 1,3,5-trimethylbenzene). Furthermore, VOC average signal-to-noise (S/N) ratios were examined. This parameter determines the average relative difference between concentrations and their corresponding uncertainties, thus pondering the results according to their quality (Norris et al, 2014). Species having a S/N ratio below 1.2 were discarded (see Debevec et al, 2017). This criteria has concerned three additional NMHCs measured from canisters (2-methylpentane, 3-methylpentane and n-heptane), two additional carbonyl compounds measured from DNPH cartridges (propanal and methacrolein) and 14 additional VOCs measured from multi-sorbent cartridges (cyclohexane, n-nonane, n-decane, n-undecane, n-dodecane, n-tridecane, n-tetradecane, n-pentadecane, n-hexadecane, 1-hexene, cyclopentene, g-terpinene, styrene and n-heptanal).

Table S2: Listed VOCs as a function of group of chemical species and measurement method. Underlined VOCs were measured by several instruments. Selected VOCs in this study are indicated in bold.

| Group of chemical species | Steel canisters – GC-FID                                                                                                                                                                                         | DNPH cartridges – chemical desorption (acetonitrile) – HPLC-UV                                                                                                                            | Solid adsorbent – adsorption/thermal desorption – GC-FID                                                                                                                                                                                                                                                                                                                                                                                                                                                       |
|---------------------------|------------------------------------------------------------------------------------------------------------------------------------------------------------------------------------------------------------------|-------------------------------------------------------------------------------------------------------------------------------------------------------------------------------------------|----------------------------------------------------------------------------------------------------------------------------------------------------------------------------------------------------------------------------------------------------------------------------------------------------------------------------------------------------------------------------------------------------------------------------------------------------------------------------------------------------------------|
| ALKANES                   | Ethane, propane, i-butane, n-butane, <b>i-pentane</b> , <b>n-pentane</b> , <u>2,2-dimethylbutane</u> , <u>2-methylpentane</u> , <u>3-methylpentane</u> , <b>n-hexane</b> , <u>n-heptane</u> , i-octane, n-octane |                                                                                                                                                                                           | <u>i-Pentane</u> , <u>n-pentane</u> , <u>2,2-dimethylbutane</u> , <u>2,3-dimethylbutane</u> +cyclopentane, <u>2-methylpentane</u> , <u>3-methylpentane</u> , <u>n-hexane</u> , cyclohexane, 2-methylhexane, 2,2,3-trimethylbutane, 2,2dimethylpentane, 2,4-dimethylpentane, 2,3-dimethylpentane, <u>n-heptane</u> , 2,3,4-trimethylpentane, <u>i-octane</u> , <u>n-octane</u> , n-nonane, n-decane, n-undecane, n-dodecane, n-tridecane, n-tetradecane, n-pentandecane, n-hexadecane<br>Cyclopentene, 1-hexene |
| ALKENES                   | Ethylene, propene                                                                                                                                                                                                |                                                                                                                                                                                           |                                                                                                                                                                                                                                                                                                                                                                                                                                                                                                                |
| ALKYNE                    | Acetylene                                                                                                                                                                                                        |                                                                                                                                                                                           |                                                                                                                                                                                                                                                                                                                                                                                                                                                                                                                |
| DIENE                     | <u>Isoprene</u>                                                                                                                                                                                                  |                                                                                                                                                                                           | <u>Isoprene</u>                                                                                                                                                                                                                                                                                                                                                                                                                                                                                                |
| TERPENES                  |                                                                                                                                                                                                                  |                                                                                                                                                                                           | <b>a-Pinene</b> , b-pinene, <b>camphene</b> , <b>limonene</b> , <b>a-terpinene</b> , g-terpinene                                                                                                                                                                                                                                                                                                                                                                                                               |
| AROMATICS                 | <u>Benzene</u> , <u>toluene</u> , <u>ethylbenzene</u> , <u>m,p-xylenes</u> , <u>o-xylene</u> , 1,2,4-trimethylbenzene                                                                                            |                                                                                                                                                                                           | <u>Benzene</u> , <u>toluene</u> , <u>ethylbenzene</u> , <u>m,p-xylenes</u> , <u>o-xylene</u> , styrene, 1,3,5-trimethylbenzene, <u>1,2,4-trimethylbenzene</u>                                                                                                                                                                                                                                                                                                                                                  |
| CARBONYL COMPOUNDS        |                                                                                                                                                                                                                  | Formaldehyde, acetaldehyde, propanal, i,n-butanals, n-pentanal+o-tolualdehyde, <u>hexanal</u> , benzaldehyde, acetone, MEK, acrolein, methacrolein, <b>glyoxal</b> , <b>methylglyoxal</b> | <u>Hexanal</u> , n-heptanal, <b>n-octanal</b> , <b>n-nonanal</b> , <b>n-decanal</b> , <b>n-undecanal</b>                                                                                                                                                                                                                                                                                                                                                                                                       |

## Section S2: Identification and contribution of NMHC major sources by EPA PMF 5.0 approach

### S2.1 PMF approach

PMF is a tool elaborated for a multivariate factor analysis and used for the identification and the characterization of the “p” independent sources of “n” species measured “m” times at a given site. Note that the PMF mathematical theory is detailed elsewhere (Paatero, 1997; Paatero and Tapper, 1994). Concisely here, the PMF method is based on the decomposition of a matrix of chemically speciated sample data (of dimension n x m) into two matrices of factor profiles (n x p) and factor contributions (p x m), interpreting each factor as a different source type. Species profiles of each source identified represent the repartition of each species into each given factor, and the amount of mass contributed by each factor to each successive individual sample represents the evolution in time of the contribution from each factor to the various species. The principle can be condensed as:

$$x_{ij} = \sum_{k=1}^p g_{jk} \times f_{ki} + e_{ij} = c_{ij} + e_{ij} , \quad (1)$$

where  $x_{ij}$  is the  $i^{\text{th}}$  species measured concentration (in  $\mu\text{g m}^{-3}$  here) in the  $j^{\text{th}}$  sample,  $f_{ki}$  the  $i^{\text{th}}$  mass fraction from  $k^{\text{th}}$  source,  $g_{jk}$  the  $k^{\text{th}}$  source contribution of the  $j^{\text{th}}$  sample,  $e_{ij}$  the residual resulting of the decomposition and  $c_{ij}$  the species reconstructed concentration. The Eq. (1) can be solved iteratively by minimizing the residual sum of squares Q following Eq. (2):

$$Q = \sum_{i=1}^n \sum_{j=1}^m \left( \frac{e_{ij}}{s_{ij}} \right)^2 , \quad (2)$$

with  $s_{ij}$ , the extended uncertainty (in  $\mu\text{g m}^{-3}$  here) of the associated  $x_{ij}$ . A user-provided uncertainty, following the procedure presented in Polissar et al. (1998), is hence required by the PMF tool to weight individual points. Moreover, negative source contributions are not allowed.

### 20 S2.2 VOC dataset and data preparation

In order to have sufficient completeness (in terms of observation number), only NMHC measurements from bi-weekly ambient air samples collected into steel canisters from 04 June 2012 to 27 June 2014 were retained in the factorial analysis of this study. The NMHC dataset encompassed 152 atmospheric data points having a 4-hour time resolution. VOC observations resulting from DNPH and multi-sorbent cartridges were not considered in the PMF analysis since they were sampled only 73 and 52 days concurrently to the VOC collection from steel canisters (Fig. S1). Reconstructing the missing data points would significantly affect the dataset quality. Additionally, the restriction of the number of data points to those common to the three datasets (36 data points) would significantly impact the temporal representativeness of the VOC inputs of the study period and would hence limit the examination of interannual and seasonal variations for reasons of statistical robustness. Note that no outlier was removed from the dataset.

NMHC inputs were built from the concentrations of the 17 HCNMs, measured from steel canisters, selected in this study (see Sect. S1). The chemical dataset includes 13 single variables and a grouped one. This latter named “EX” resulted from the grouping of the concentrations of C<sub>8</sub> aromatic compounds, in order to maximize its concentration levels.

The data preprocessing and quality analysis of the VOC PMF dataset are presented in the supplement material of Debevec et al. (2017). In this study, since signal-to-noise (S/N) ratios of the 14 variables selected in the factorial analysis are all higher than 1.2, no variable was categorized as “weak”, and hence downweighted (categorizing variables in “weak” means tripling their original uncertainties; Norris et al, 2014).

### S2.3 Selected PMF Solution

In order to identify the optimal number of factors for the PMF solution selected in this study, the first step consisted in carrying out numerous successive base runs considering an incremented factor number, according to the protocol defined by Sauvage et al. (2009). PMF solutions composed of 2 to 10 factors, considering 100 runs and a random start, were explored.

Firstly, the selection of a solution among PMF solutions of 2 to 10 factors is based on the analysis of diverse exploratory statistical parameters (Table S3 and Fig. S6) which are as follows:

- Variations in  $Q_{\text{true}}$  and  $Q_{\text{theoretical}}$  as a function of the factor number of a PMF solution.  $Q_{\text{true}}$  is provided by the EPA PMF tool (Norris et al., 2014) following the launch of a base model run.  $Q_{\text{theoretical}}$  is a calculated parameter following the equation (3).  $Q_{\text{true}}$  and  $Q_{\text{theoretical}}$  tend to decrease when the factor number increases. A PMF user can choose a PMF solution having a lower  $Q_{\text{true}}$  compared to the associated  $Q_{\text{theoretical}}$ .
- Variations in IM and IS (maximum individual standard deviation and maximum individual column mean, respectively) as a function of the factor number of a PMF solution. IM and IS can be defined following equations (4) and (5), respectively. A PMF user can choose a PMF solution corresponding to a significant break in the slope of IM and/or IS as a function of the PMF factor number.
- Variations in average determination coefficients between reconstructed concentrations of the total variable (called in this study TVOC; see Norris et al., 2014) and measured ones ( $R^2(\text{TVOC})$ ). A PMF user can choose a PMF solution of  $p$  factors corresponding to a significant increase in  $R^2(\text{TVOC})$  compared to a PMF solution of  $p-1$  factors.
- An optimal PMF solution should also present a symmetrical distribution of residual values related to the total variable as well as a large proportion of them ranging between -2 and 2, especially between -0.3 and 0.3.

$$\text{for } p \in [2, 10], Q_{\text{theoretical}} = M \times N - p \times (M + N), \quad (3)$$

with  $M=152$  and  $N=14$  in this study (Sect. S2.2).

$$IM = \max \left( \frac{1}{M} \sum_{j=1}^M \frac{e_{ij}}{s_{ij}} \right), \text{ among } i \in [1, N] \quad (4)$$

$$IS = \max \left( \sqrt{\frac{1}{M-1} \sum_{j=1}^M \left[ \frac{e_{ij}}{s_{ij}} - \left( \frac{e_{ij}}{s_{ij}} \right) \right]^2} \right), \text{ among } i \in [1, N] \quad (5)$$

The visual inspection of statistical indicators was realized following Fig. S6. Significant breaks in slope of variations in IM as a function of the factor number of a PMF solution were noticed for PMF solutions composed of 3 to 5 factors, 4 to 6 factors and 7 to 9 factors (Fig. S6c; see also the relative differences  $d(IM)$  and  $d(IS)$  in Table S3). Moreover, a significant break in slope of variations in IS as a function of the factor number of a PMF solution was only noticed for PMF solutions composed of 5 to 7 factors (Fig. S6d).  $R^2(TVOC)$  increases significantly between PMF solutions of 3 and 4 factors and to a lesser extent between PMF solutions of 4 to 7 factors (Fig. S6e). Contrarily,  $R^2(TVOC)$  decreases significantly between PMF solutions of 7 and 8 factors. However,  $Q_{true}$  is lower than  $Q_{theoretical}$  from a PMF solution of 8 factors (Fig. S6a). From a PMF solution of 4 factors, the proportion of residual values between -2 and 2 is higher than 90% and from a PMF solution of 5 factors, the proportion of residual values between -0.3 and 0.3 is higher than 40% (Fig. S6b). As a result, we oriented our choice of optimal PMF solution to those of 4 to 6 factors.

In order to refine this choice, we also examined correlations between reconstructed concentrations and measured ones for individual species of the selected PMF solutions (Figs S7-S9 and Table S4), their distribution of residual values (Fig S10), the physical meaning of their factor profiles (Fig S11), their factor contribution time series (Fig S11) and correlations between their factors. From a PMF solution of 4 factors, the model identified a factor related to a biogenic source (factor 1 depicted in Fig. S11 and related to isoprene concentrations). A better reconstruction of ethane, acetylene and isoprene concentrations was noticed for the 4-factor PMF solution (Fig S7). We did not observe any correlation between factors composing the 4-factor PMF solution. From a PMF solution of 5 factors, the model distinguished a factor related to the more reactive anthropogenic species (factor 2 of the 5-factor PMF solution composed of ethylene, propene, toluene and EX - Fig. S11) from the factor associated with evaporation sources (factor 3 composed of propane, i,n-butanes and i,n-pentanes - Fig. S11). These two factors are not correlated (determination coefficient: 0.35). This deconvolution notably improved the reconstruction by the PMF model of concentrations of ethylene, propene, toluene and EX (Figs. S7 and S9 and Table S4) and slightly improved the distribution of residual values for propene and toluene (Fig. S10). Ethane and isoprene concentrations are fully reconstructed with the PMF solution of 5 factors (Fig. S8 and Table S4) and their residual values were more symmetrical and gathered between -1 and 1 (Fig. S10). The additional factor composing the 6-factor PMF solution compared to the 5-factor one results from the split of the factor related to the more reactive anthropogenic species into two factors. The first one (factor 2 of the 6-factor PMF solution – Fig. S11) is mostly composed of ethylene and propene while the second one (factor 3 – Fig. S11) is composed of propene, i,n-pentanes, toluene and EX. These two factors are not correlated (determination coefficient: 0.02 – Fig. S11). This deconvolution notably improved the reconstruction of ethylene concentrations (Fig. S9 and Table S4), slightly improved the reconstruction of i,n-pentanes, toluene and EX concentrations but degraded propene concentration one. In terms of residual value distribution, the 6-factor PMF solution mostly improved the ethylene one (Fig. S10). However, ethylene, propene, i,n-pentanes, toluene and EX concentrations observed at Ersa in summer 2013 were mainly explained by the same factor according to Michoud et al. (2017), which comforted our choice of a 5-factor PMF solution for this study.

**Table S3: Exploratory statistical parameters for the identification of the optimal factor number for the PMF solution of this study.**

| Factor number | Q theoretical | Q robust mod | Q true | IM     | IS     | Proportion of residuals between [-2 ;2] | Proportion of residuals > abs(0,3) | Determination coefficient PMF results vs Meas. (R <sup>2</sup> ) | d(IM) = (IM(p) - IM(p-1)) / IM(p-1) | d(IS) = (IS(p) - IS(p-1)) / IS(p-1) |
|---------------|---------------|--------------|--------|--------|--------|-----------------------------------------|------------------------------------|------------------------------------------------------------------|-------------------------------------|-------------------------------------|
| 2             | 1796          | 6557         | 7472   | 0.9249 | 3.1160 | 0.7904                                  | 0.8008                             | 0.9653                                                           | -                                   | -                                   |
| 3             | 1630          | 4352         | 4749   | 0.8838 | 2.5538 | 0.8604                                  | 0.7702                             | 0.9746                                                           | 0.0444                              | 0.1804                              |
| 4             | 1464          | 3057         | 3169   | 0.4239 | 1.9464 | 0.9037                                  | 0.7049                             | 0.9879                                                           | 0.5204                              | 0.2378                              |
| 5             | 1298          | 2092         | 2120   | 0.2659 | 1.5157 | 0.9441                                  | 0.6109                             | 0.9920                                                           | 0.3727                              | 0.2213                              |
| 6             | 1132          | 1545         | 1547   | 0.2260 | 1.1361 | 0.9615                                  | 0.5550                             | 0.9939                                                           | 0.1503                              | 0.2504                              |
| 7             | 966           | 1161         | 1162   | 0.2255 | 1.0810 | 0.9737                                  | 0.5028                             | 0.9952                                                           | 0.0021                              | 0.0485                              |
| 8             | 800           | 777          | 777    | 0.1153 | 0.9373 | 0.9864                                  | 0.4384                             | 0.9883                                                           | 0.4885                              | 0.1329                              |
| 9             | 634           | 558          | 558    | 0.1133 | 0.8282 | 0.9915                                  | 0.3435                             | 0.9873                                                           | 0.0180                              | 0.1164                              |
| 10            | 468           | 380          | 380    | 0.0939 | 0.7596 | 0.9953                                  | 0.2740                             | 0.9836                                                           | 0.1713                              | 0.0828                              |

**Table S4: Evaluation of NMHC concentrations reconstructed by PMF solutions from 4 to 6 factors.**

| VOC           | r <sup>2</sup> |           |           | slope     |           |           | intercept |           |           |
|---------------|----------------|-----------|-----------|-----------|-----------|-----------|-----------|-----------|-----------|
|               | 4 factors      | 5 factors | 6 factors | 4 factors | 5 factors | 6 factors | 4 factors | 5 factors | 6 factors |
| (0) TVOC      | 0.988          | 0.992     | 0.994     | 1.003     | 1.013     | 1.013     | -0.034    | -0.072    | -0.060    |
| (1) Ethane    | 0.992          | 0.998     | 0.999     | 0.977     | 0.994     | 1.000     | 0.037     | 0.009     | -0.001    |
| (2) Ethylene  | 0.666          | 0.771     | 0.985     | 0.618     | 0.722     | 0.938     | 0.086     | 0.065     | 0.017     |
| (3) Propane   | 0.950          | 0.968     | 0.969     | 0.990     | 1.002     | 1.007     | -0.010    | -0.013    | -0.016    |
| (4) Propene   | 0.275          | 0.454     | 0.411     | 0.350     | 0.534     | 0.488     | 0.034     | 0.024     | 0.026     |
| (5) i-Butane  | 0.894          | 0.909     | 0.913     | 0.820     | 0.833     | 0.842     | 0.033     | 0.030     | 0.028     |
| (6) n-Butane  | 0.946          | 0.969     | 0.969     | 0.953     | 0.969     | 0.968     | 0.009     | 0.005     | 0.006     |
| (7) Acetylene | 0.989          | 0.993     | 0.989     | 0.952     | 0.971     | 0.973     | 0.008     | 0.006     | 0.006     |
| (8) i-Pentane | 0.657          | 0.654     | 0.712     | 0.692     | 0.687     | 0.743     | 0.053     | 0.054     | 0.046     |
| (9) n-Pentane | 0.328          | 0.331     | 0.378     | 0.421     | 0.419     | 0.470     | 0.082     | 0.082     | 0.077     |
| (10) Isoprene | 0.568          | 0.995     | 0.995     | 0.362     | 0.998     | 1.009     | 0.054     | -0.0004   | -0.002    |
| (11) n-Hexane | 0.560          | 0.537     | 0.582     | 0.546     | 0.546     | 0.583     | 0.029     | 0.029     | 0.027     |
| (12) Benzene  | 0.898          | 0.918     | 0.908     | 0.858     | 0.896     | 0.867     | 0.031     | 0.022     | 0.029     |
| (13) Toluene  | 0.539          | 0.600     | 0.630     | 0.467     | 0.597     | 0.677     | 0.113     | 0.090     | 0.083     |
| (14) EX       | 0.342          | 0.536     | 0.623     | 0.332     | 0.548     | 0.665     | 0.134     | 0.102     | 0.079     |

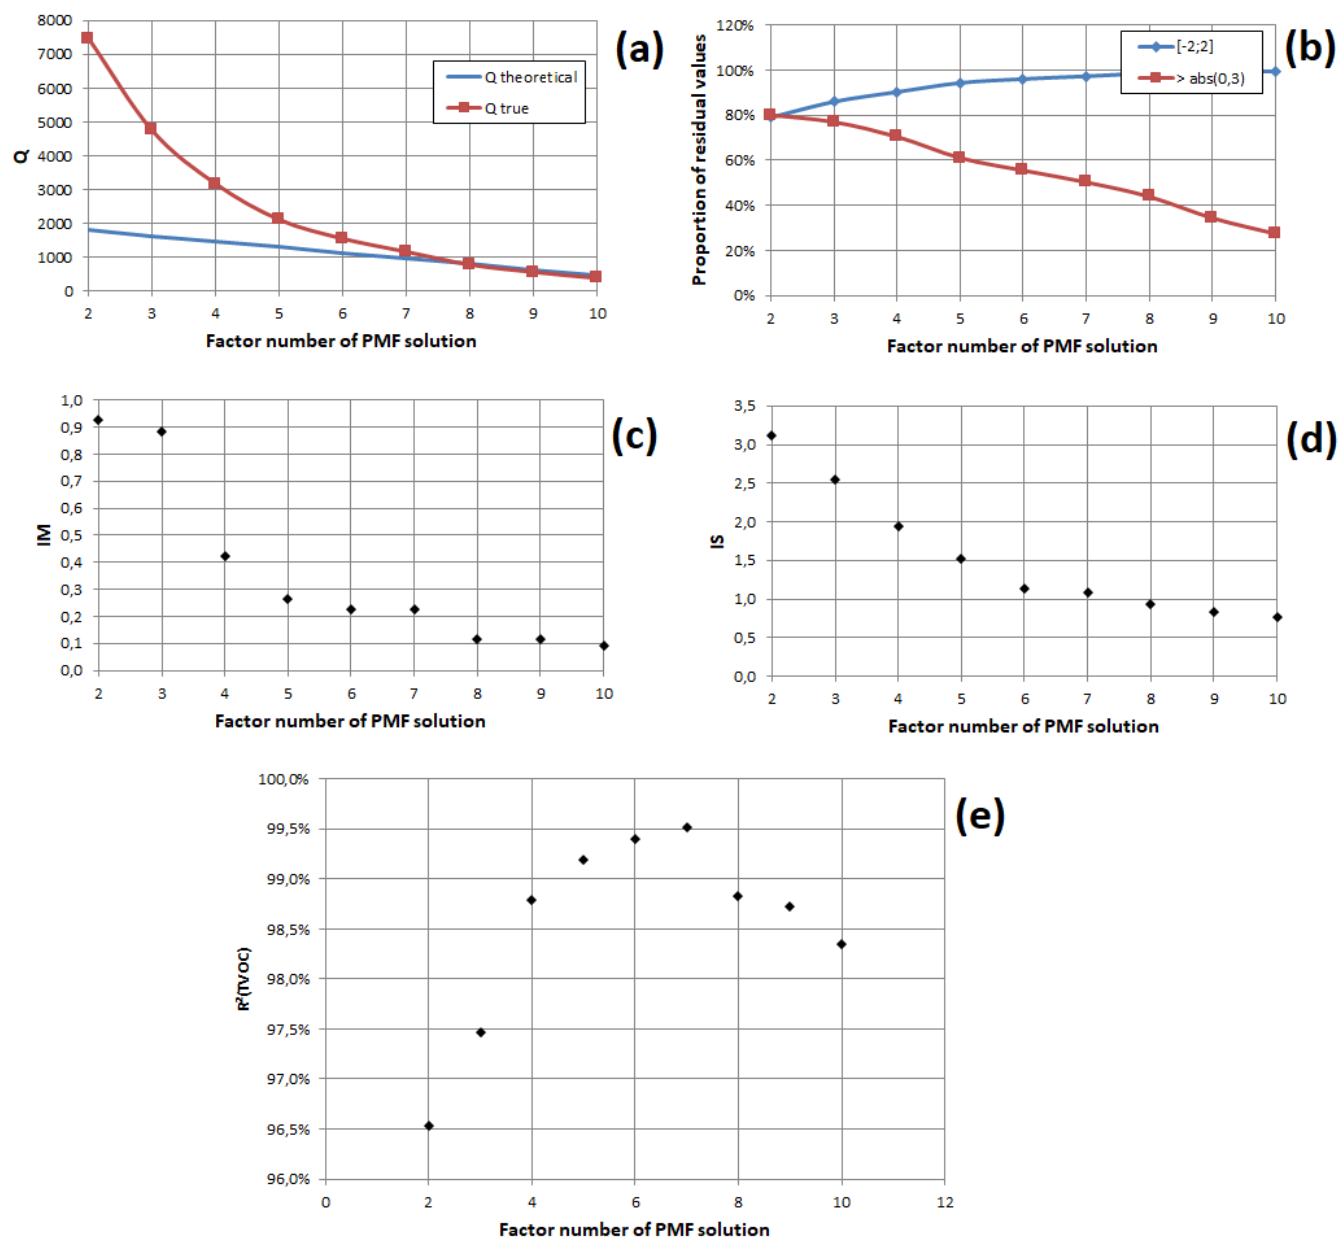

Figure S6: Variations in exploratory statistical parameters as a function of the factor number of a PMF solution.

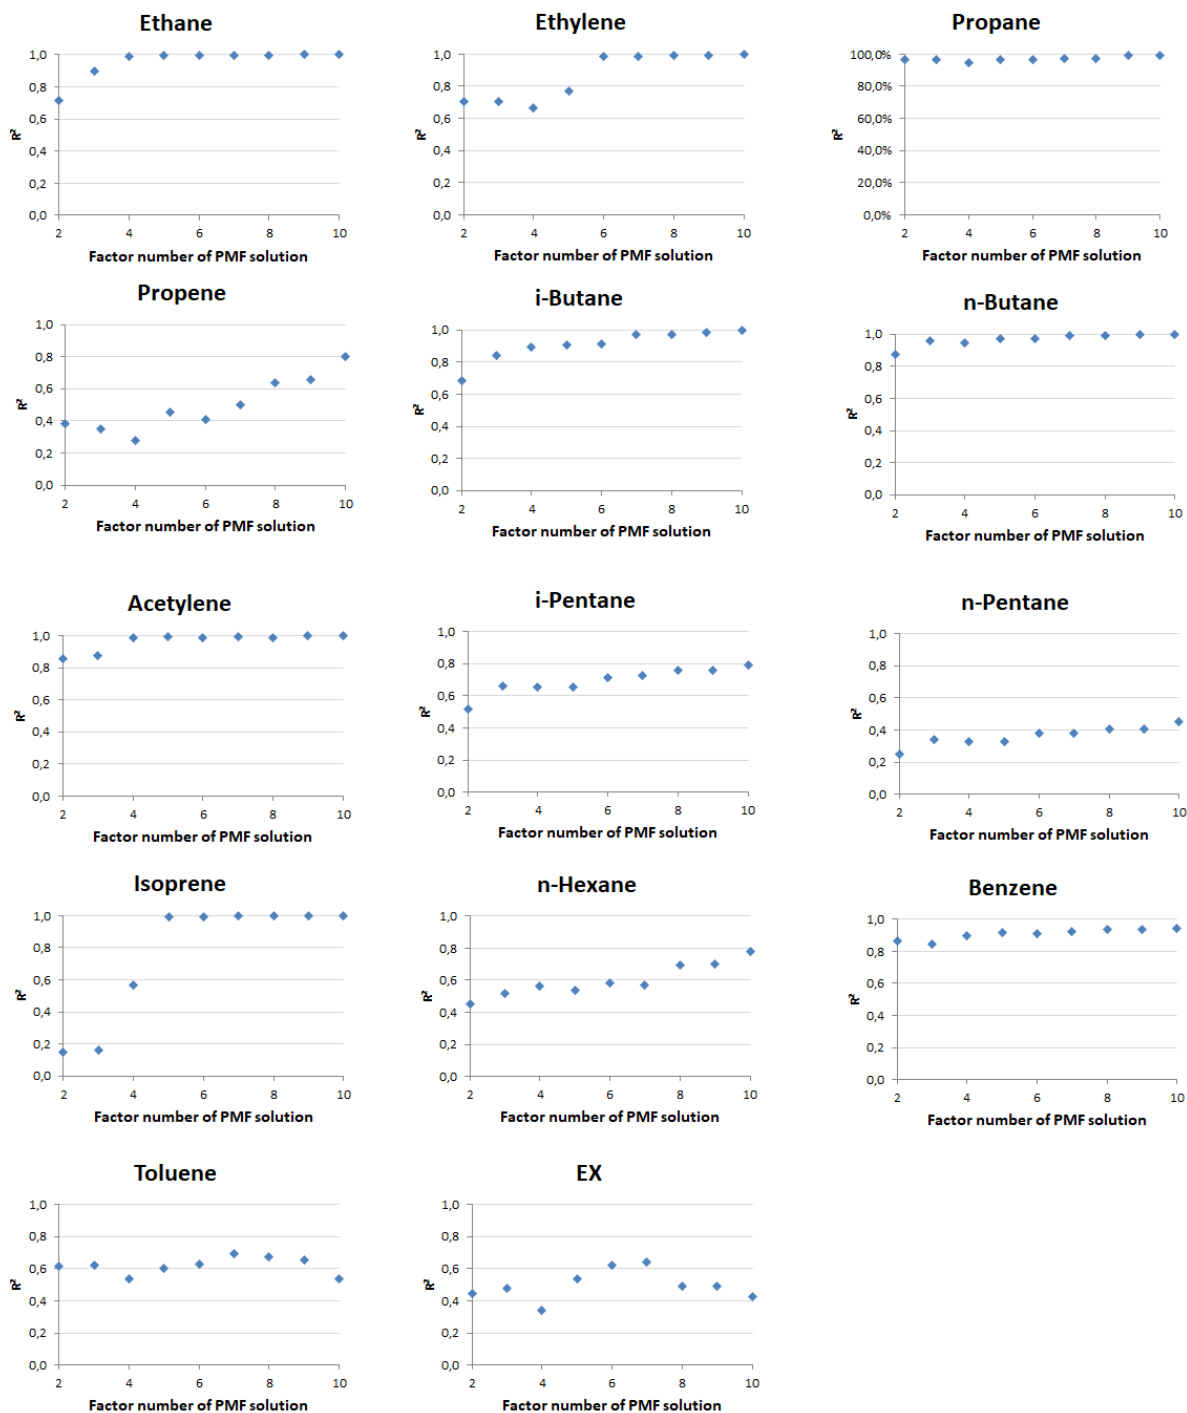

**Figure S7: Correlations between NMHC concentrations reconstructed by the PMF model and measured ones as a function of the factor number of a PMF solution.**

## Ethylene

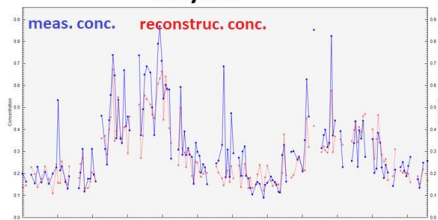

## Propene

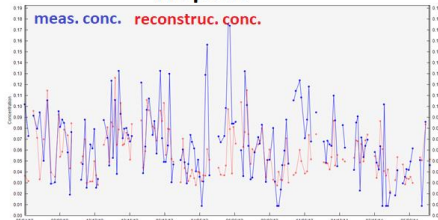

## Isoprene

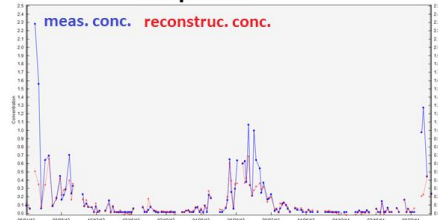

**i-Pentane**

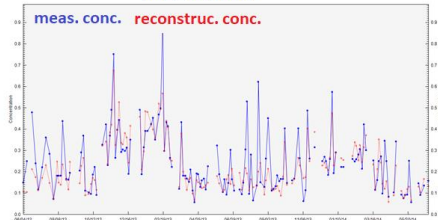

## n-Pentane

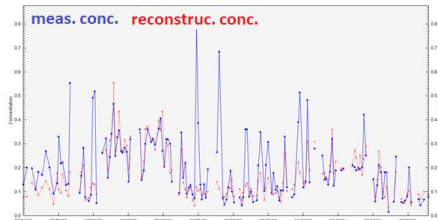

## Ethylene

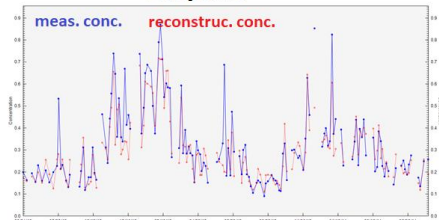

## Propene

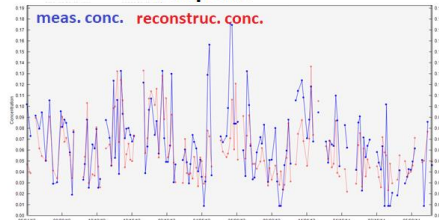

## Isoprene

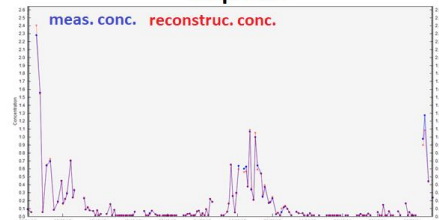

## i-Pentane

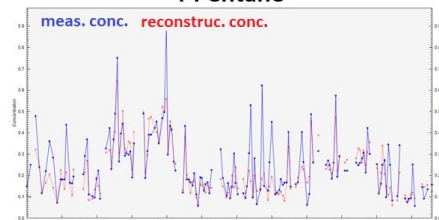

## n-Pentane

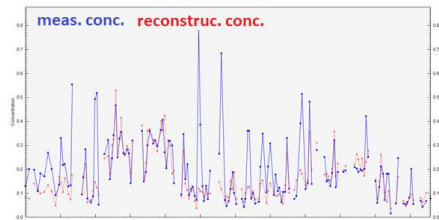

## Ethylene

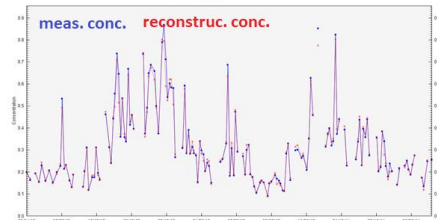

## Propene

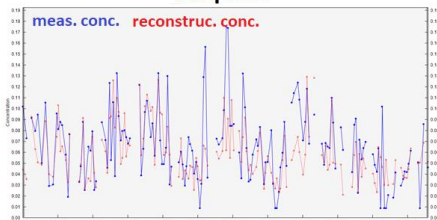

## Isoprene

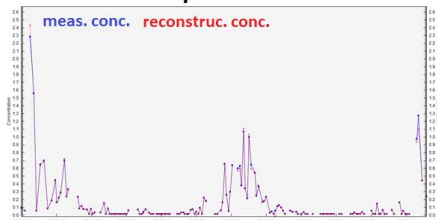

## i-Pentane

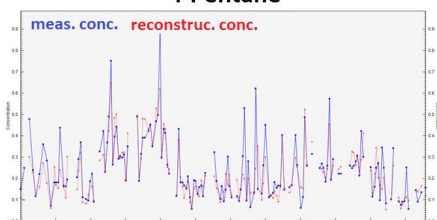

## n-Pentane

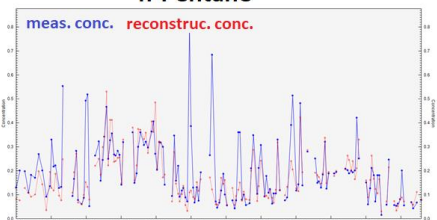

### PMF solution of 4 factors

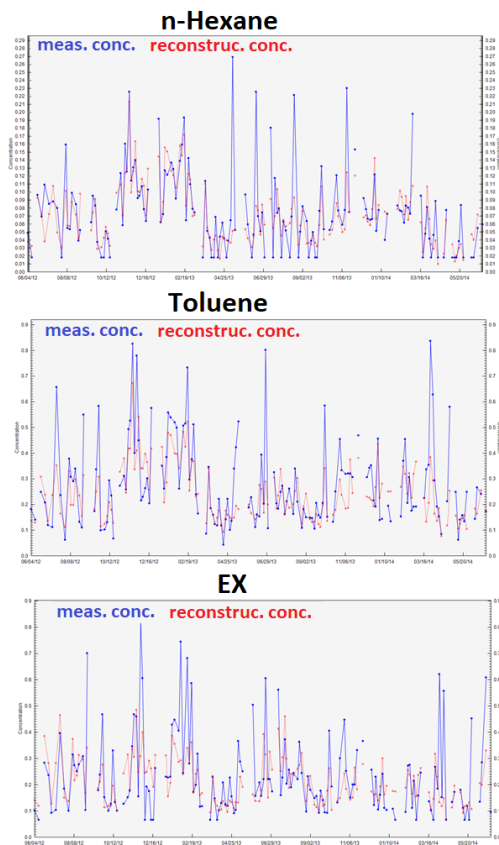

### PMF solution of 5 factors

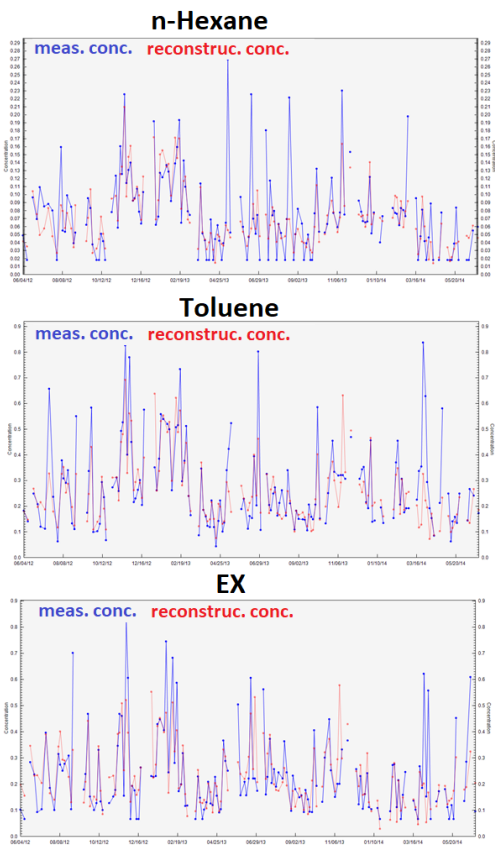

### PMF solution of 6 factors

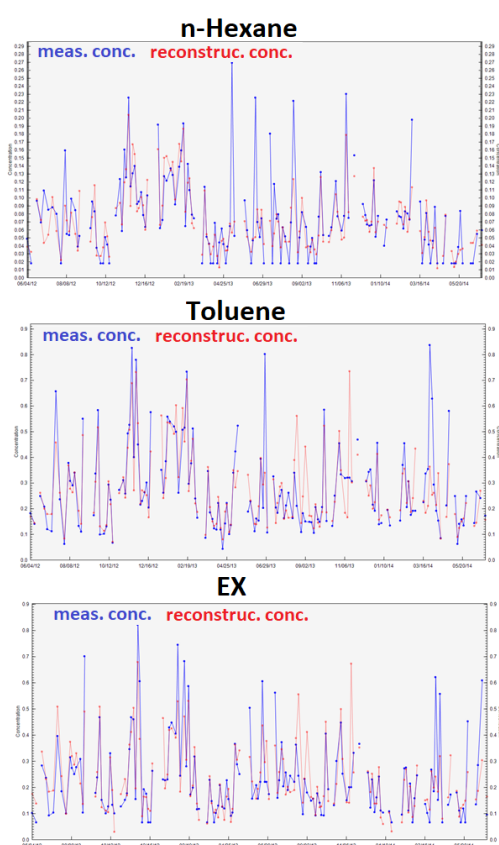

**Figure S8: Time series of NMHC concentrations reconstructed by PMF solutions from 4 to 6 factors compared to NMHC measured concentrations. Note that only results of NMHCs not well reconstructed by the PMF model ( $r^2 < 0.85$ , see Table S4) are presented.**

### PMF solution of 4 factors

#### Ethylene

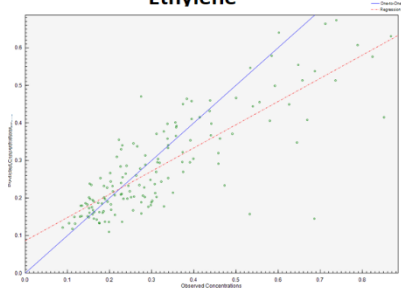

#### Propene

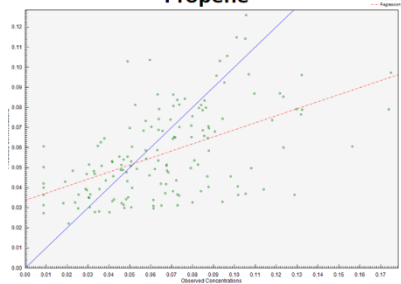

#### Isoprene

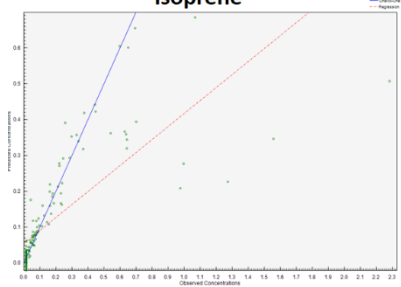

#### i-Pentane

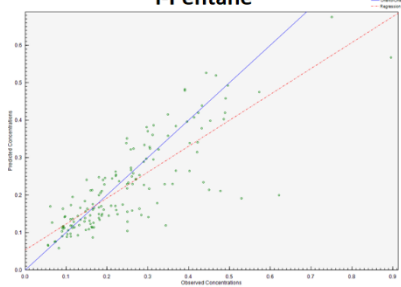

### PMF solution of 5 factors

#### Ethylene

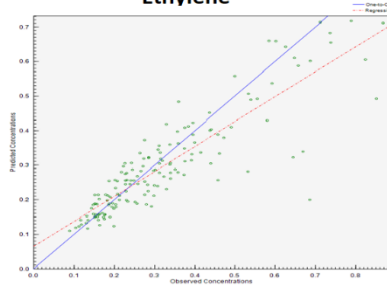

#### Propene

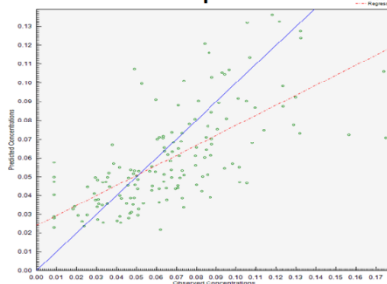

#### Isoprene

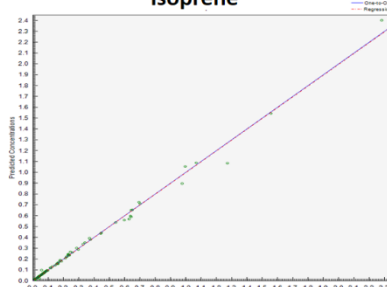

#### i-Pentane

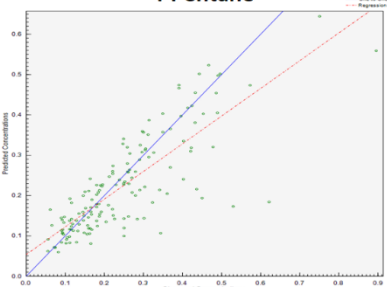

### PMF solution of 6 factors

#### Ethylene

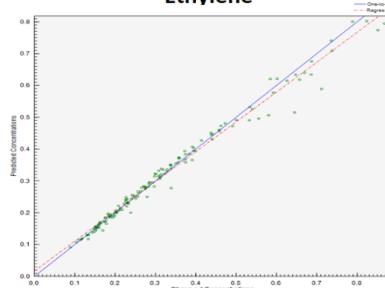

#### Propene

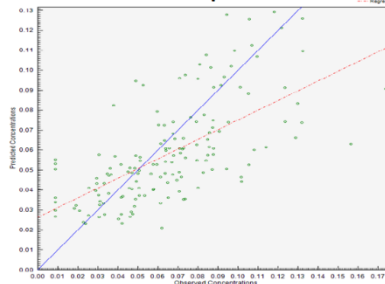

#### Isoprene

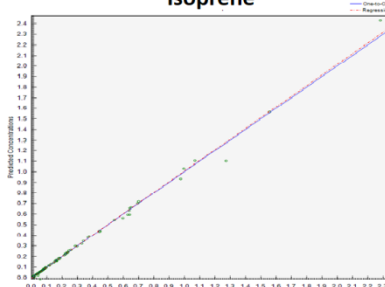

#### i-Pentane

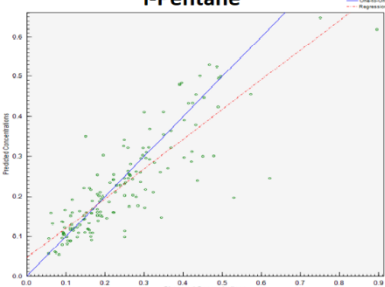

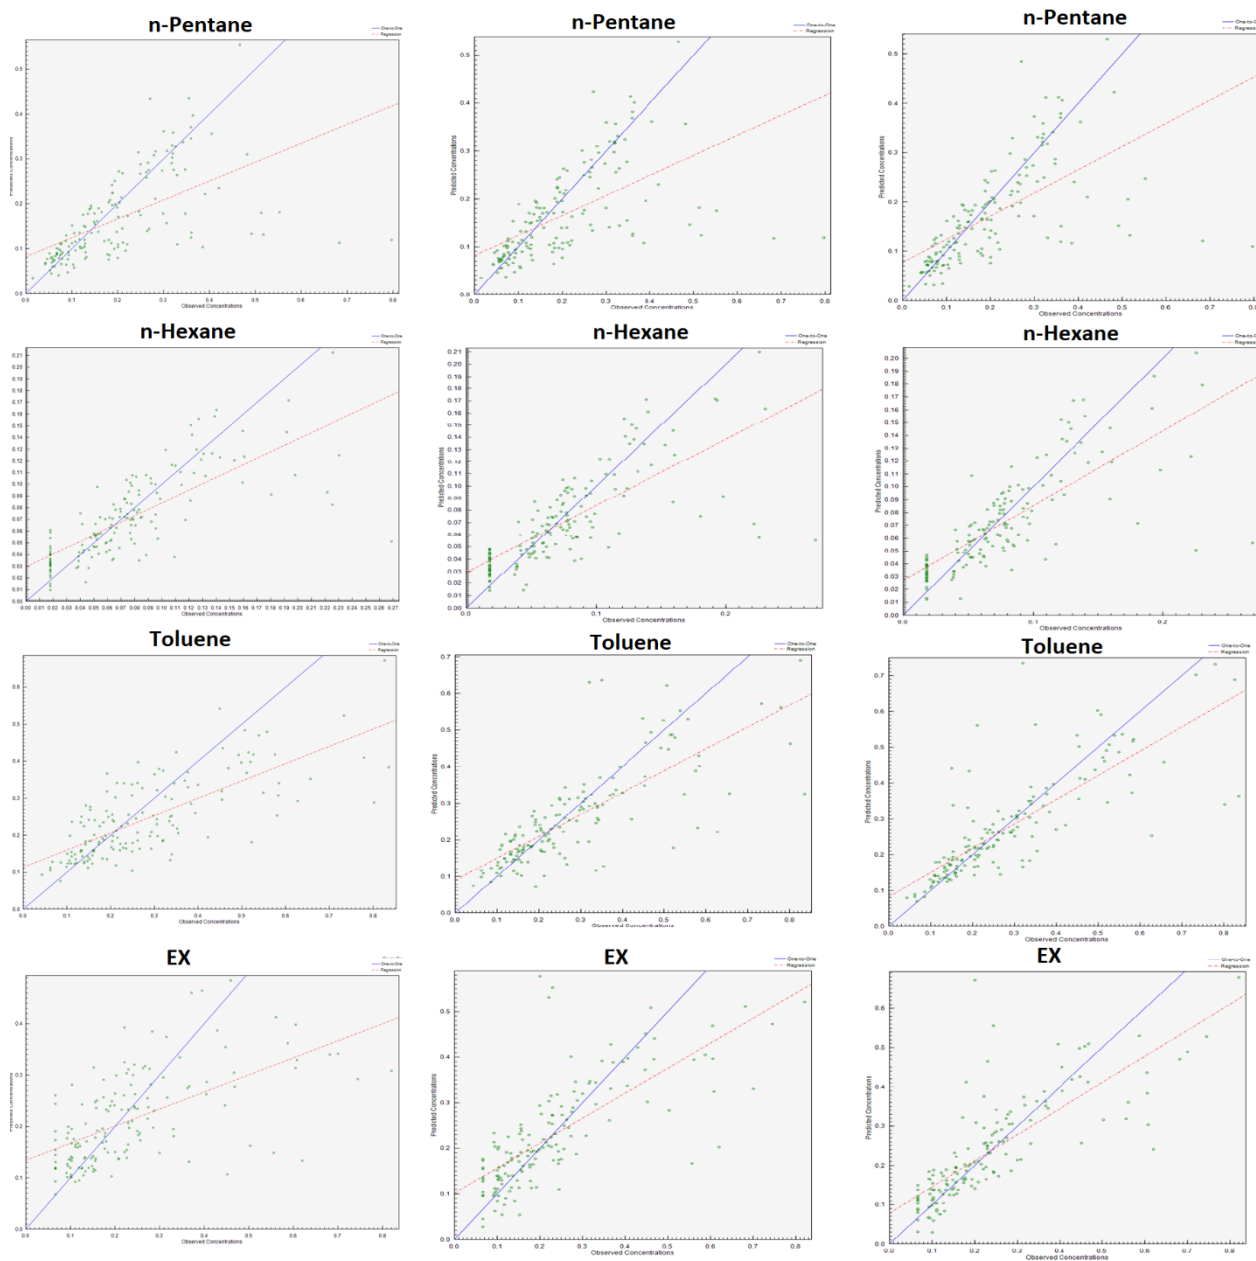

**Figure S9: Scatter plots of NMHC concentrations reconstructed by PMF solutions from 4 to 6 factors and NMHC measured concentrations. Note that only results of NMHCs not well reconstructed by the PMF model ( $r^2 < 0.85$ , see Table S4) are presented.**

PMF solution of 4 factors

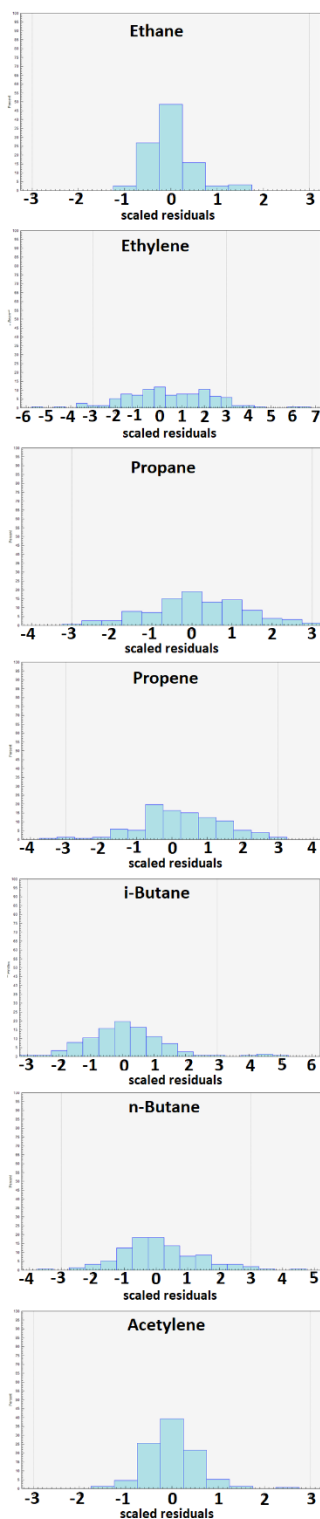

PMF solution of 5 factors

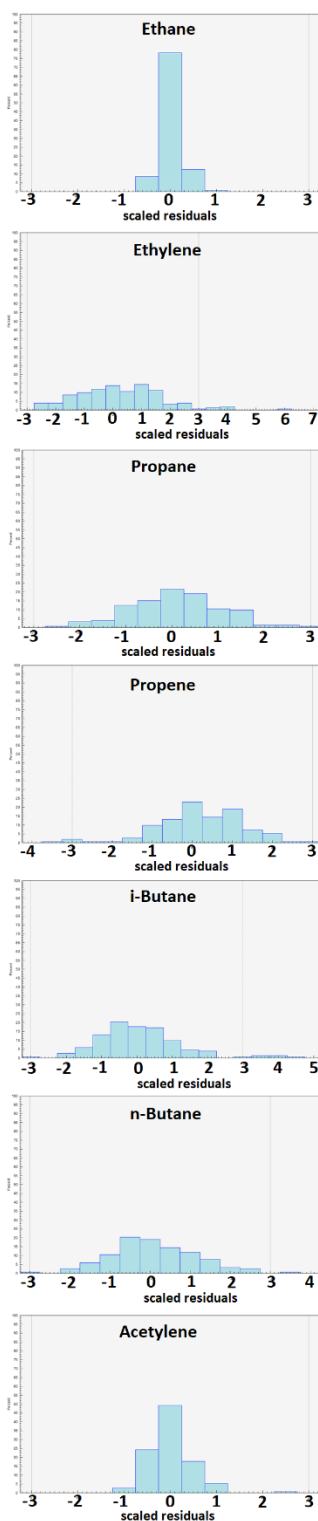

PMF solution of 6 factors

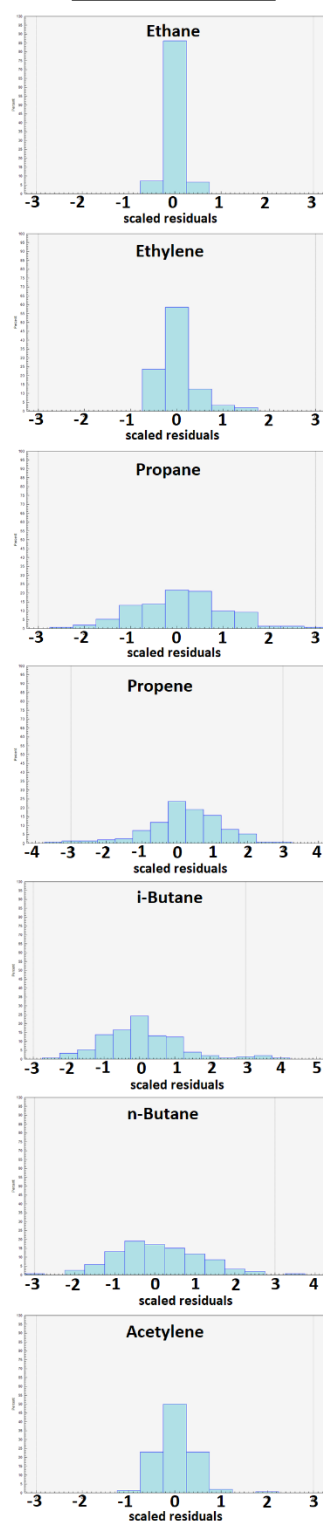

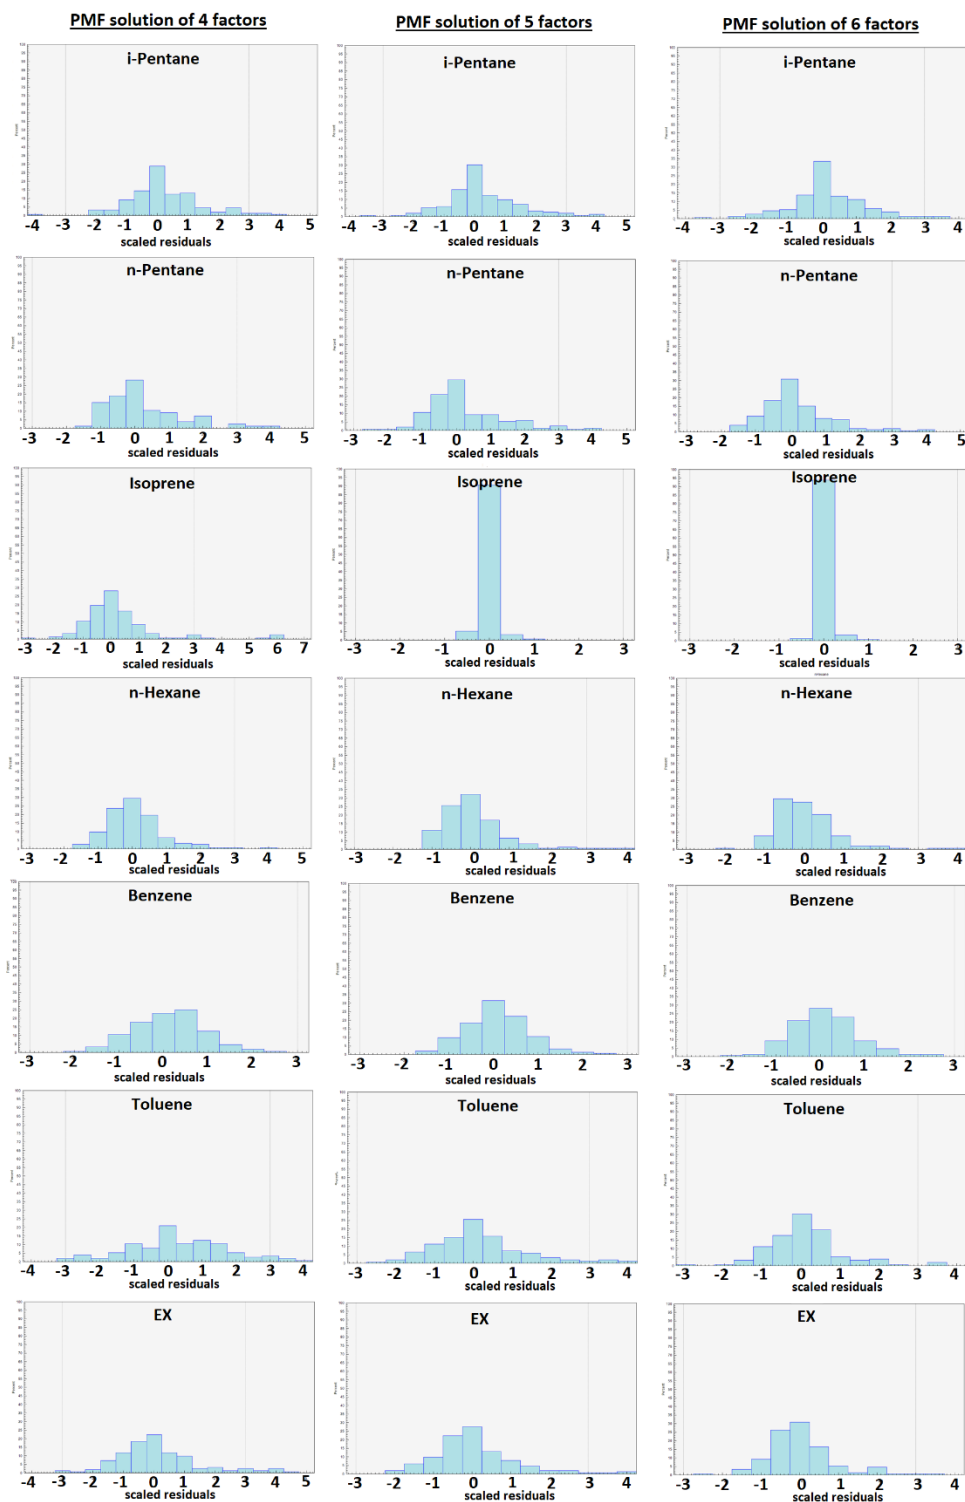

Figure S10: Distributions of scaled residuals of NMHC concentrations reconstructed by PMF solutions from 4 to 6 factors.

### PMF solution of 4 factors

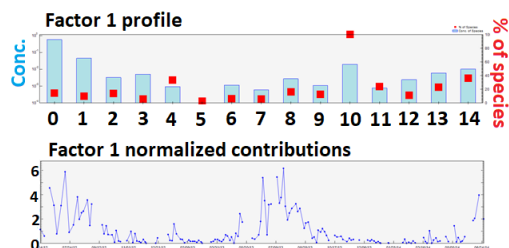

### PMF solution of 5 factors

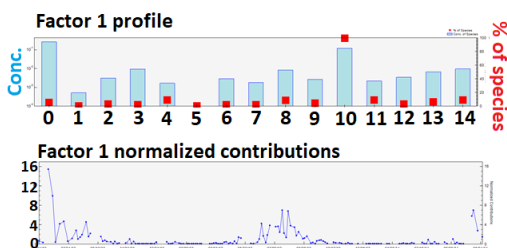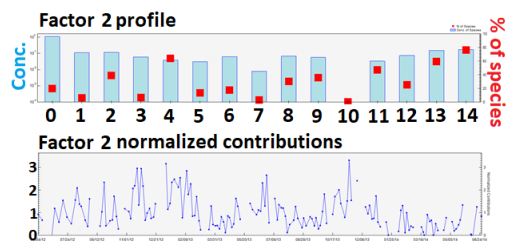

### PMF solution of 6 factors

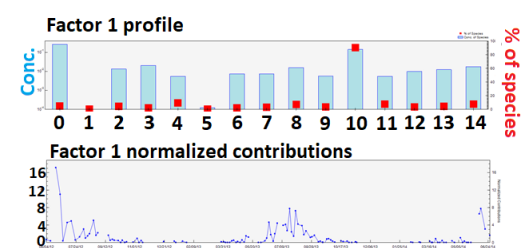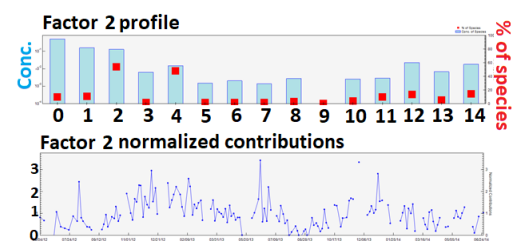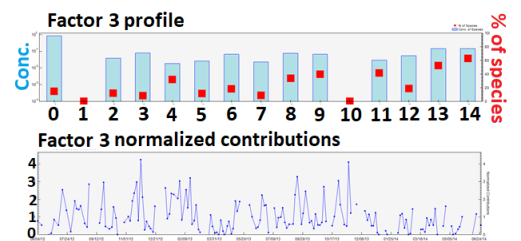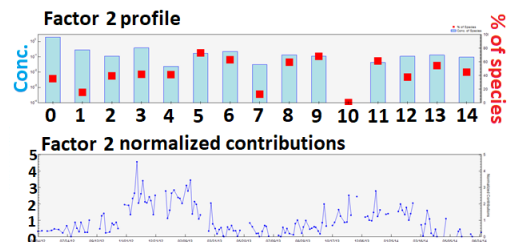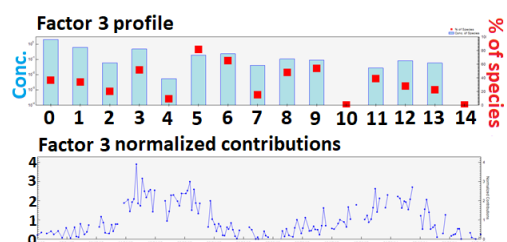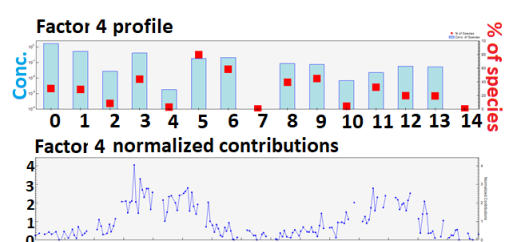

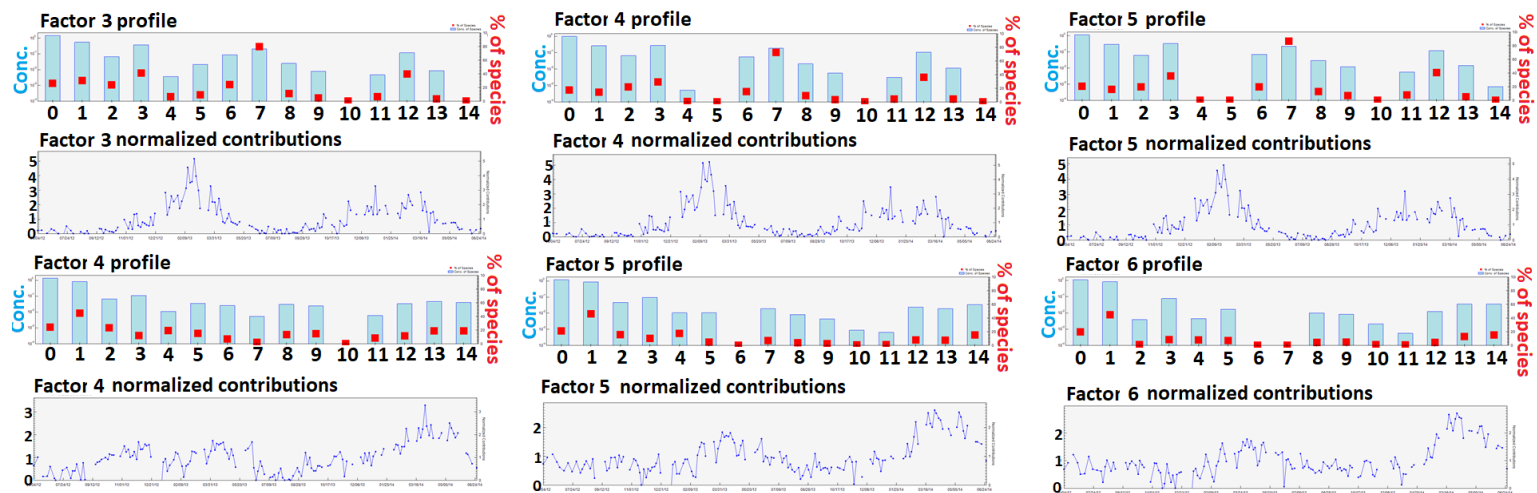

**Figure S11: Factor profiles and normalized contribution time series of PMF solutions from 4 to 6 factors. Note that NMHCs numbered 0-14 are listed in Table S4.**

**S2.4 Optimization of the selected PMF solution**

Generally, the non-negativity constraint alone is considered insufficient to obtain a unique solution. In order to reduce the number of solutions, one possible approach is to rotate a given solution and assess the obtained results with the initial solution.

5 The optimization of the 5-factor PMF solution selected in this study relies on the exploration of the rotational freedom of this solution by acting on the  $F_{\text{peak}}$  parameter (Paatero et al., 2005; Paatero et al., 2002), following recommendations of Norris et al. (2014), so as to reach an optimized final solution. As a result, a  $F_{\text{peak}}$  parameter fixed at 0.8 and applied to the selected PMF solution allowed a finer decomposition of the NMHC dataset following an acceptable change of the Q-value (Norris et al., 2014).

10 Quality indicators provided by the EPA PMF application have been indicated in Table S5. The PMF model results reconstructed on average 99% of the total concentration of the 14 variables incorporated in this factorial analysis. Individually, almost all chemical species also showed both good determination coefficients and slopes (close to 1 – Table S4) between reconstructed and measured concentrations, apart from propene, n-pentane, n-hexane and EX (see Fig. S9). The PMF model reconstructed well variations in concentrations of these species over long periods (Fig. S8) but not over short-periods,

15 explaining their lower determination coefficients and their slopes farther from 1 (Table S4). Therefore, PMF model limitations to explain concentrations of these species should be kept in mind when examining PMF results.

**Table S5: Input information and mathematical diagnostic for the PMF analysis results of this study.**

| Input information                                     |                       |        |
|-------------------------------------------------------|-----------------------|--------|
| Samples                                               | N                     | 152    |
| Variables                                             | M                     | 14     |
| Factors                                               | P                     | 5      |
| Runs                                                  |                       | 100    |
| Nb. Species indicated as weak                         |                       | 0      |
| $F_{\text{peak}}$                                     |                       | 0.8    |
| Model quality                                         |                       |        |
| Q robust                                              | Q(r)                  | 2589.7 |
| Q true                                                | Q(t)                  | 2119.9 |
| Maximum individual standard deviation                 | IM                    | 0.27   |
| Maximum individual column mean                        | IS                    | 1.52   |
| Mean ratio (modelled vs. measured)                    | Slope(TVOC)           | 1.01   |
| TVOC <sub>modelled</sub> vs. TVOC <sub>measured</sub> | R <sup>2</sup> (TVOC) | 0.99   |
| Nb. of species with R <sup>2</sup> > 0.6              |                       | 10     |
| Nb. of species with 1.1 > slope > 0.6                 |                       | 9      |

The evaluation of rotational ambiguity and random errors in a given PMF solution can be realized with DISP (displacement) and BS (bootstrap) error estimation methods (Brown et al., 2015; Norris et al., 2014; Paatero et al., 2014). As no factor swap occurred in the DISP analysis results, the 5-factor PMF solution selected in this study is considered adequately robust to be interpreted. Bootstrapping was then realized by performing 100 runs, and considering a random seed, a block size of 18 samples and a minimum Pearson correlation coefficient of 0.6. Each modeled factor of the selected PMF solution was well mapped over at least 95% of realized runs, assuring their reproducibility.

Moreover, since sampling time of NMHC measurements from canister shifted several times during the two years of the study period (Table 1), correlations between reconstructed and measured NMHC concentrations as a function of sampling period were investigated (Table S6). Slightly different correlation results were observed for observations resulting from samples collected from 12:00-16:00 UTC (from early June 2012 to late October 2012 and from early January 2013 to late October 2013) compared to those collected from 09:00-13:00 UTC (from early November 2012 to late December 2012 and from early November 2013 to late June 2014). The PMF model slightly overestimated TVOC concentrations resulting from samples collected from 09:00-13:00 and slightly underestimated those collected from 12:00-16:00, mostly due to reconstruction of ethane and propane concentrations in both cases. Concerning more reactive NMHCs, ethylene, i-butane, isoprene, toluene and EX concentrations are better reconstructed with samples collected from 12:00-16:00 while propene, i-pentane, n-pentane and n-hexane concentrations are better reconstructed with those from 09:00-13:00. The most impacted species by sampling time shifts was n-pentane, since the PMF model did not identify the sources influencing the high concentrations of n-pentane observed over short periods (see Fig S9) and which were mostly noticeable with the 12:00-16:00 sample set. More generally, the influence of sampling time shifts on PMF results also depends on the frequency and the amplitude of NMHC concentration variations over short periods for the two sample sets.

**Table S6: Evaluation of NMHC concentrations reconstructed by the PMF model as a function of the sampling time shift.**

|                  | All period |           |                | Samples collected from 09:00-<br>13:00 UTC |           |                | Samples collected from 12:00-<br>16:00 UTC |           |                |
|------------------|------------|-----------|----------------|--------------------------------------------|-----------|----------------|--------------------------------------------|-----------|----------------|
|                  | slope      | intercept | r <sup>2</sup> | slope                                      | intercept | r <sup>2</sup> | slope                                      | intercept | r <sup>2</sup> |
| <b>Ethane</b>    | 0.997      | 0.006     | 0.999          | 0.986                                      | 0.029     | 0.996          | 1.002                                      | 0.001     | 0.999          |
| <b>Ethylene</b>  | 0.727      | 0.064     | 0.779          | 0.593                                      | 0.111     | 0.673          | 0.796                                      | 0.044     | 0.827          |
| <b>Propane</b>   | 1.000      | -0.011    | 0.968          | 0.929                                      | 0.052     | 0.949          | 1.046                                      | -0.035    | 0.977          |
| <b>Propene</b>   | 0.534      | 0.024     | 0.438          | 0.632                                      | 0.018     | 0.489          | 0.497                                      | 0.026     | 0.418          |
| <b>i-Butane</b>  | 0.832      | 0.029     | 0.897          | 0.761                                      | 0.056     | 0.869          | 0.893                                      | 0.015     | 0.904          |
| <b>n-Butane</b>  | 0.967      | 0.004     | 0.963          | 0.954                                      | 0.010     | 0.957          | 0.975                                      | 0.002     | 0.961          |
| <b>Acetylene</b> | 0.952      | 0.008     | 0.975          | 0.991                                      | 0.003     | 0.991          | 0.941                                      | 0.007     | 0.972          |
| <b>i-Pentane</b> | 0.686      | 0.053     | 0.644          | 0.783                                      | 0.054     | 0.765          | 0.623                                      | 0.052     | 0.600          |
| <b>n-Pentane</b> | 0.421      | 0.081     | 0.332          | 0.852                                      | 0.032     | 0.788          | 0.295                                      | 0.085     | 0.238          |
| <b>Isoprene</b>  | 0.956      | 0.005     | 0.996          | 0.872                                      | 0.005     | 0.996          | 0.971                                      | 0.006     | 0.998          |
| <b>n-Hexane</b>  | 0.510      | 0.032     | 0.519          | 0.668                                      | 0.026     | 0.738          | 0.419                                      | 0.035     | 0.410          |
| <b>Benzene</b>   | 0.889      | 0.022     | 0.895          | 0.918                                      | 0.027     | 0.849          | 0.873                                      | 0.018     | 0.911          |
| <b>Toluene</b>   | 0.582      | 0.092     | 0.599          | 0.526                                      | 0.105     | 0.501          | 0.626                                      | 0.083     | 0.669          |
| <b>EX</b>        | 0.527      | 0.103     | 0.515          | 0.452                                      | 0.112     | 0.431          | 0.582                                      | 0.095     | 0.578          |
| <b>TVOC</b>      | 1.004      | -0.186    | 0.992          | 0.988                                      | -0.083    | 0.987          | 1.009                                      | -0.213    | 0.993          |

### Section S3: Identification of potential emission areas by CF approach

In order to investigate potential emission regions contributing to long-distance pollution transport to the receptor site, PMF source contributions were coupled with back-trajectories of air masses following a statistical approach. To achieve this, the concentration field (CF) statistical method established by Seibert et al (1994) was chosen in the present study.

5           The CF approach relies on the attribution of concentrations of a variable measured at a receptor site along back-trajectories of air masses arriving at this site. In a second step, the trajectory map is gridded so that concentrations attributed to a given cell are weighted by the residence time spent by air parcels in the considered cell (Eq. (3); Michoud et al., 2017):

$$\log(\overline{C_{ij}}) = \frac{\sum_{L=1}^M \log(C_L) \times n_{ij-L}}{\sum_{L=1}^M n_{ij-L}} = \frac{1}{n_{ij}} \sum_{L=1}^M \log(C_L) \times n_{ij-L}, \quad (3)$$

10           with  $\overline{C_{ij}}$  the concentration attributed to the  $ij^{\text{th}}$  grid cell,  $C_L$  the concentration observed when the back-trajectory L reached the measurement site,  $n_{ij-L}$  the number of points of the back-trajectory L contained in the  $ij^{\text{th}}$  grid cell,  $n_{ij}$  the number of points of the total number of back-trajectories contained in the  $ij^{\text{th}}$  grid cell, and M the total number of back-trajectories.

Section S4: Comparisons of VOC measurements with other ones performed at Ersa

Additional VOC measurements were realized during summer campaigns performed in 2012, 2013 and 2014 (Table S7). One hundred of 3-h-integrated air samples were collected at Ersa on DNPH cartridges from 29 June to 11 July 2012 at a frequency of 8 samples per day. These air samples were collected and analyzed following the same protocol as the one presented in Sect. 2.2.1. Additionally, the ChArMEx SOP-1b (special observation period 1b) field campaign took place at Ersa from 15 July to 5 August 2013. During this intensive field campaign, more than 80 VOCs were measured by different on-line and off-line techniques, which were deeply presented in Michoud et al. (2017) and summarized in Table S7. Formaldehyde measurements realized during the SOP-1b field campaign with DNPH cartridges are also used in this study. Finally, around 70 3-h-integrated air samples were collected at Ersa from 26 June to 10 July 2014 on DNPH cartridges (54 samples realized at a frequency of 4 cartridges per day from 6h-18h UTC) or on stainless steel canisters (20 samples realized at a frequency of 3 canisters per day from 9h-18h UTC). These air samples were collected and analyzed following the same protocol as the one presented in Sect. 2.2.1. All these measurements were confronted with the two years of VOC measurements investigated in this study, in order to examine the representativeness of the study period in terms of summer concentration levels and variations. Time series of concentrations of selected VOCs, biogenic and anthropogenic compounds and OVOCs, are depicted in Figs S12-S14, respectively.

Table S7: Technical details of the set-up for VOC measurement during the intensive field campaigns realized at Ersa in summers 2012, 2013 and 2014.

| Field campaign       | Instrument               | Time resolution | Species observations used in this study                                      | References                              |
|----------------------|--------------------------|-----------------|------------------------------------------------------------------------------|-----------------------------------------|
| Summer 2012          | Off-line DNPH            | 180 min         | formaldehyde, acetaldehyde, acetone and MEK                                  | Detournay, 2011; Detournay et al., 2013 |
|                      | On-line PTR-TOF-MS       | 10 min          | isoprene, acetaldehyde, acetone and MEK                                      | Michoud et al., 2017                    |
| Summer 2013 (SOP-1b) | On-line GC-FID-FID       | 90 min          | ethane, propane, n-butane, n-pentane, ethylene, acetylene, benzene           | Michoud et al., 2017                    |
|                      | On-line GC-FID-MS        | 90 min          | $\alpha$ -pinene, $\beta$ -pinene and limonene                               | Michoud et al., 2017                    |
|                      | Off-line DNPH            | 180 min         | formaldehyde                                                                 | Detournay, 2011; Detournay et al., 2013 |
| Summer 2014          | Off-line DNPH            | 180 min         | formaldehyde, acetaldehyde, acetone and MEK                                  | Detournay, 2011; Detournay et al., 2013 |
|                      | Off-line steel canisters | 180 min         | ethane, propane, n-butane, n-pentane, ethylene, acetylene, benzene, isoprene | Sauvage et al., 2009                    |

During the SOP-1b field campaign, biogenic compounds were measured on-line by different techniques (proton transfer reaction time-of-flight mass spectrometer - PTR-TOF-MS - or GC-FID-MS; Table S7). In summer 2013, concentrations of  $\alpha$ -pinene measured during the SOP-1b field campaign were of the same range as those measured off-line during the 2-yr field campaign. Isoprene concentrations were observed at higher concentrations during the SOP-1b (concentrations up to  $3.5 \mu\text{g m}^{-3}$  – Fig. S12), which can be partly related to the finer time resolution and the better temporal coverage of these measurements. Note that isoprene daily maximal concentrations measured during the SOP-1b campaign were variable in relation to temperature variations (Kalogridis, 2014; Michoud et al., 2017). Additionally, isoprene concentrations measured during the summer 2014 field campaign were low, in agreement with those observed in June 2014 during the 2-yr field campaign.

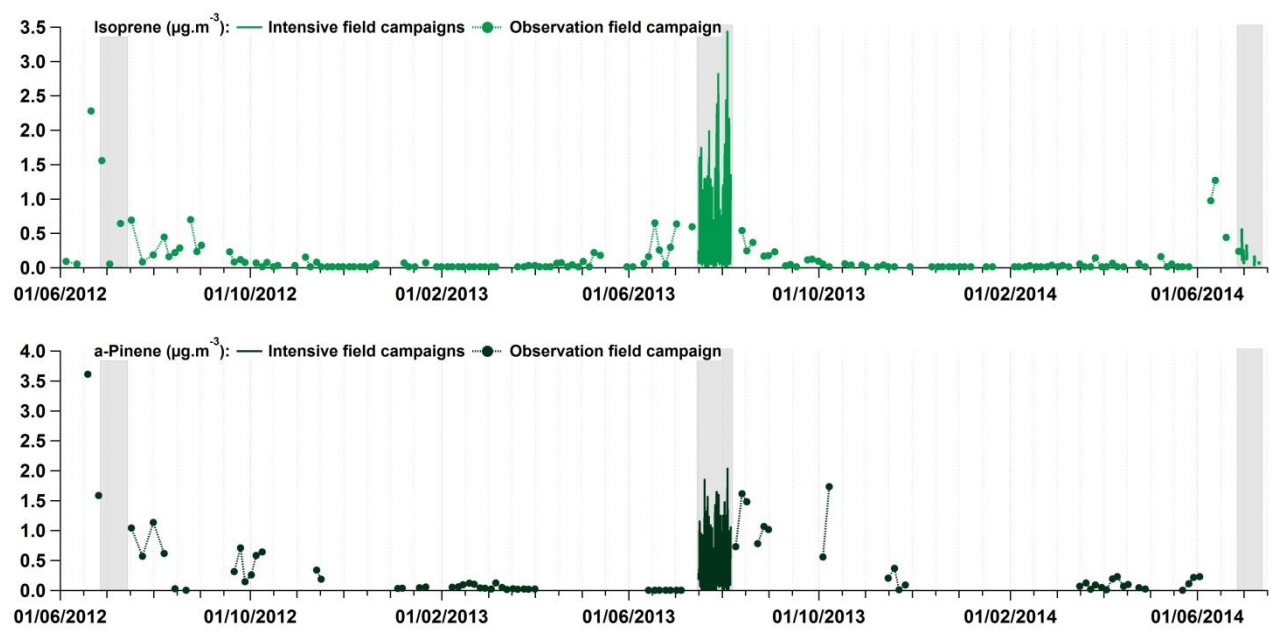

**Figure S12: Concentration time series of a selection of biogenic VOCs (expressed in  $\mu\text{g m}^{-3}$ ) measured during the different field campaigns conducted at Ersä. Grey rectangles pinpoint periods when intensive field campaigns were realized. Time is given in UTC.**

Anthropogenic VOC concentrations were measured with an on-line GC-FID-FID during the SOP-1b field campaign and from stainless steel canisters during the summer 2014 field campaign (Table S7). Whatever their lifetime in the atmosphere, low anthropogenic VOC concentration levels were noticed during the summer field campaigns carried out in 2013 and 2014 (Fig. S13), in agreement with seasonal variations described in Sect. 3.4.2. These findings can suggest that the annual temporal coverage of VOC measurements realized over the two years was sufficiently adapted to well characterize VOC concentration variations (at seasonal scale).

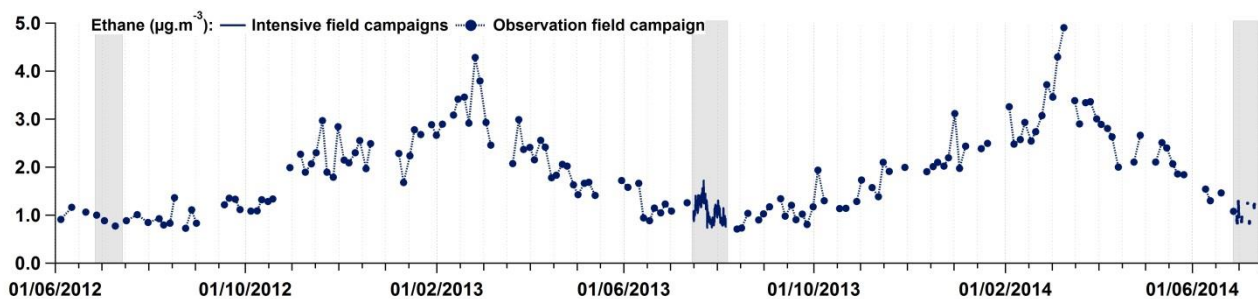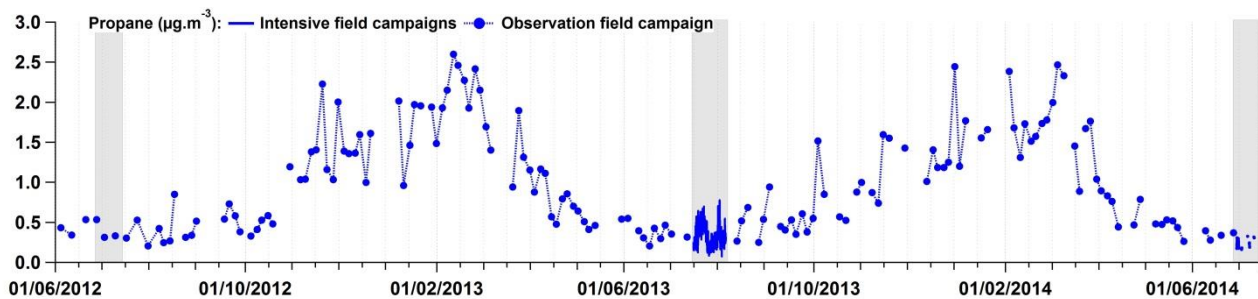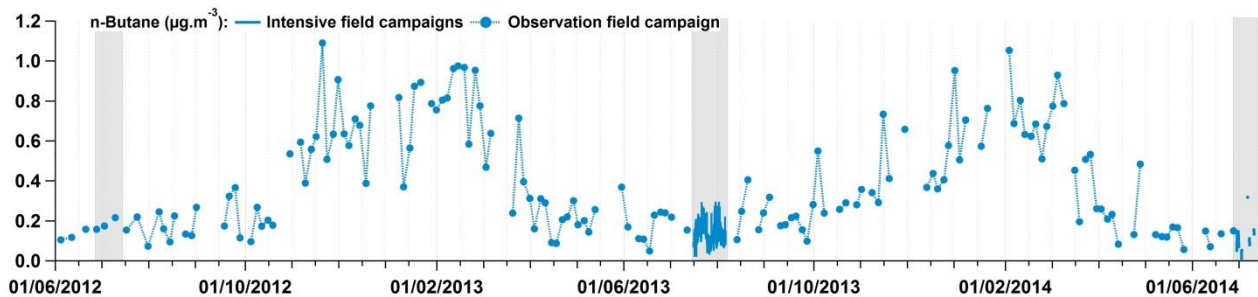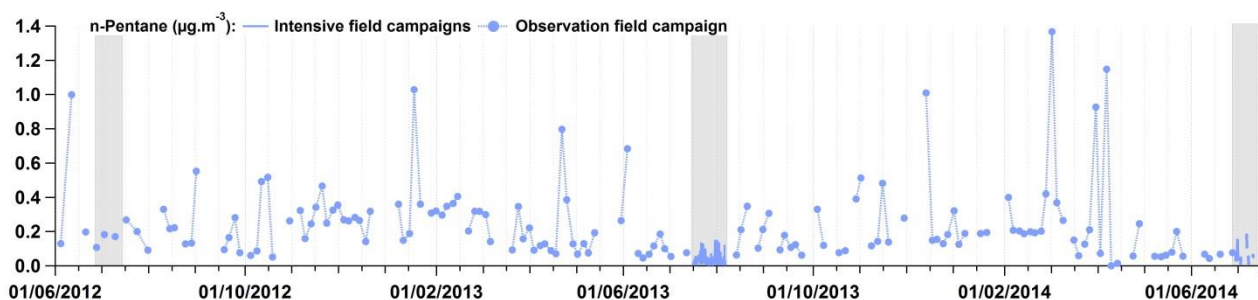

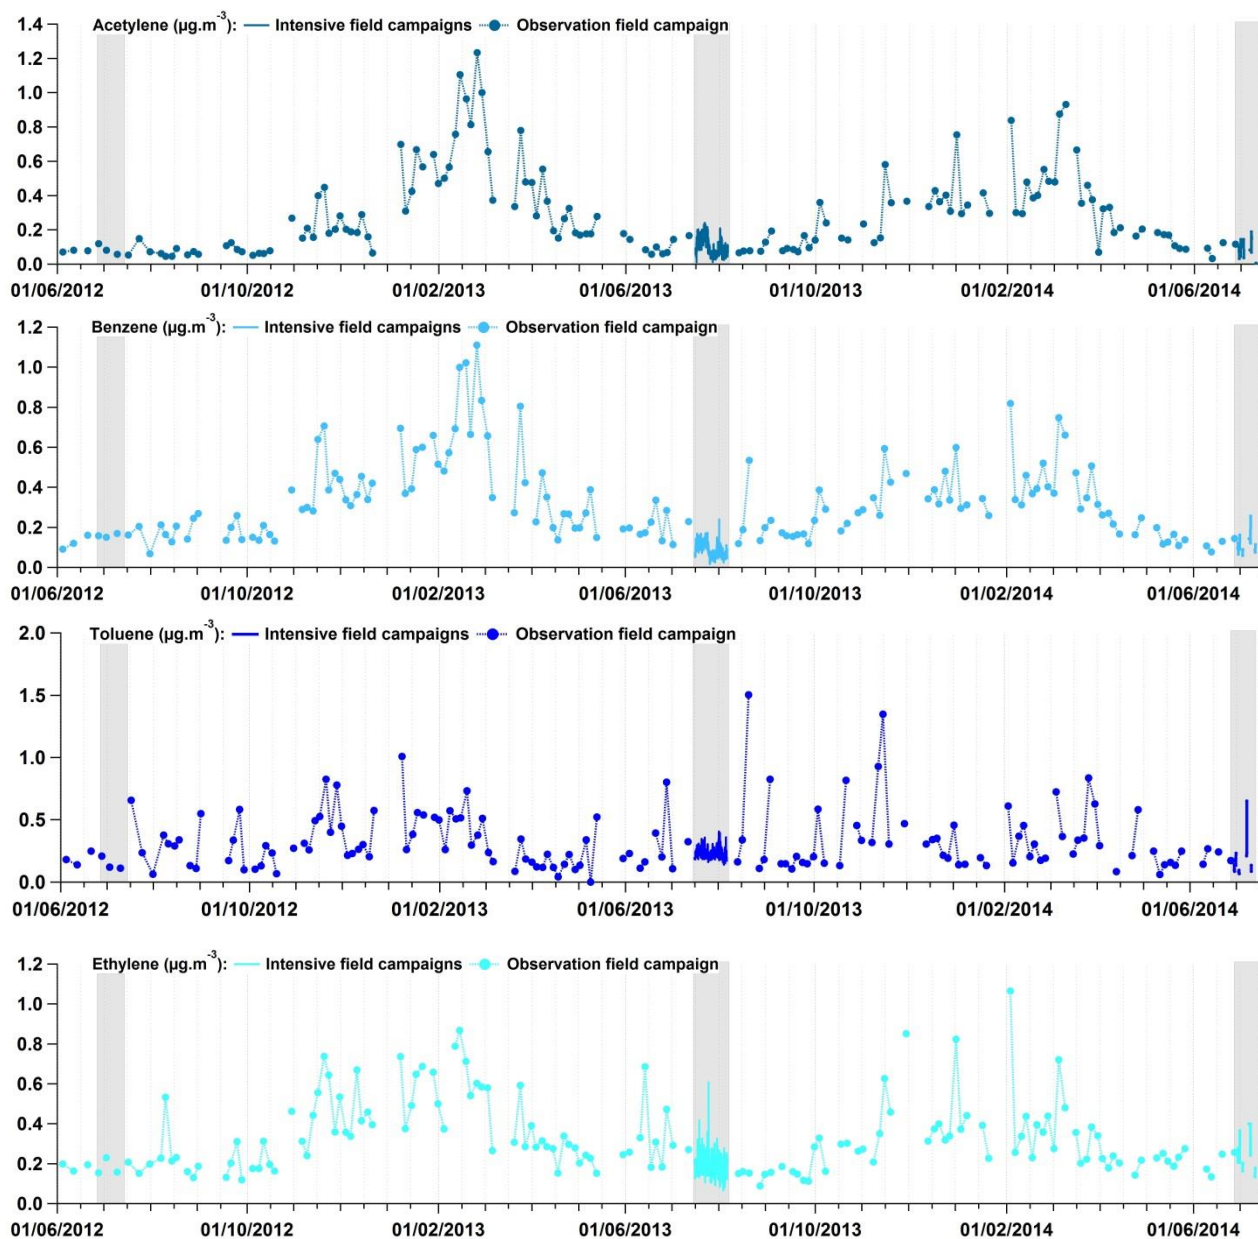

**Figure S13:** Concentration time series of a selection of anthropogenic VOCs (expressed in  $\mu\text{g m}^{-3}$ ) measured during the different field campaigns conducted at Ersa. Grey rectangles pinpoint periods when intensive field campaigns were realized. Time is given in UTC.

During the summer field campaigns carried out in 2012 and 2014, OVOCs were measured off-line using DNPH cartridges. During the SOP-1b field campaign, they were also measured with a PTR-TOF-MS (Table S7). OVOC concentration levels during the three summer field campaigns (Fig. S14) were consistent with seasonal variations described in Sect. 3.4.3.

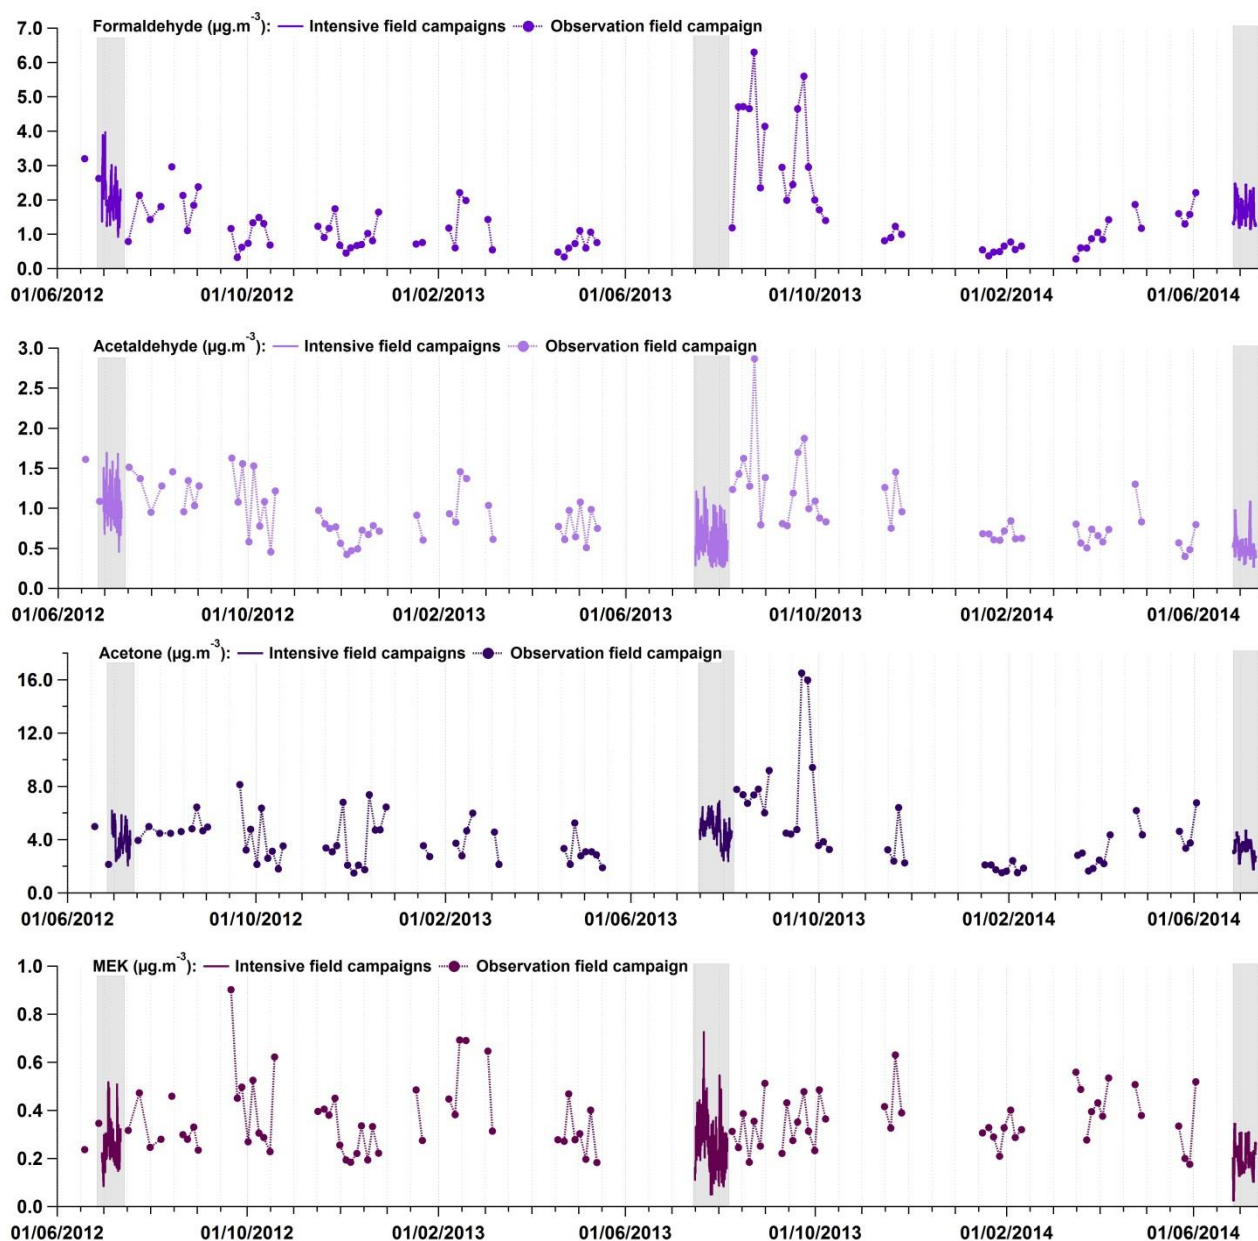

**Figure S14:** Concentration time series of a selection of oxygenated VOCs (expressed in  $\mu\text{g m}^{-3}$ ) measured during the different field campaigns conducted at Ersra. Grey rectangles pinpoint periods when intensive field campaigns were realized. Time is given in UTC.

**Section S5: Comparisons of VOC source apportionment with previous one performed at Ersa**

Figure S15 compares average relative contributions of PMF factors (modelled with two different datasets and presented in this study and Michoud et al., 2017) to VOC concentrations monitored at Ersa during the two-year and the summer 2013 study periods. Note that the SOP-1b factorial analysis was realized considering additional primary NMHCs (2-methyl-2-butene+1-pentene, 2,2-dimethylbutane, undecane+camphor, C9-aromatics; which represented 2% of the total mass of the NMHCs considered in this PMF analysis) and non-speciated monoterpenes (19%), which were measured with automatic analysers deployed at Ersa only during the SOP-1b field campaign (Sect. S4).

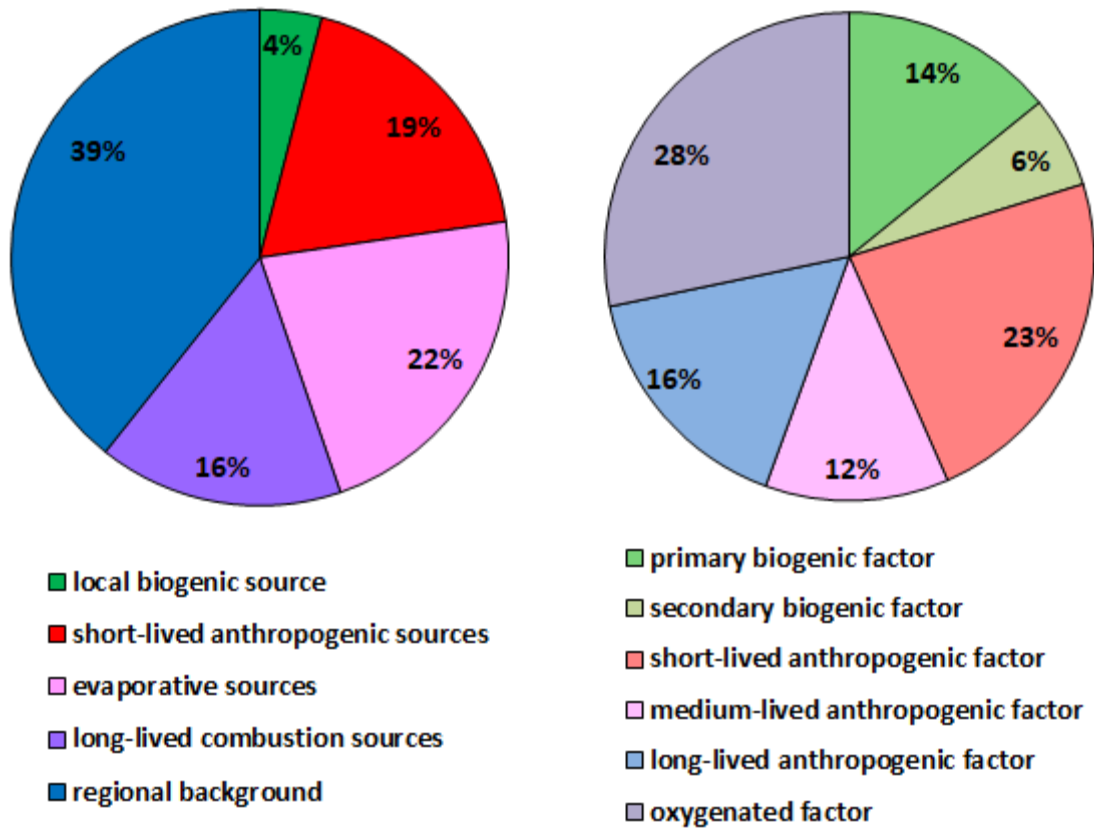

**Figure S15: Factor relative contributions (expressed in %) to VOC concentrations of the 2-yr period (on the left) compared to factor relative contributions to VOC concentrations of the SOP-1b (on the right).**

Firstly, the local biogenic source (factor 1 – this study) was mainly composed of isoprene like the SOP-1b primary biogenic factor. The latter also explained a large portion of monoterpene concentrations along with from 11 to 15% of some OVOC concentrations (carboxylic acids, methanol and acetone). The SOP-1b primary biogenic factor contributed 14% to the

VOC total mass measured in summer 2013, partly considering the contribution of OVOCs to this factor (~60% of the factor contribution). The local biogenic source contribution was only 4% to the total mass of the NMHCs selected in the PMF analysis of this study but its contribution was higher in summer (12 and 15% during summers 2012 and 2013, respectively).

Short-lived anthropogenic sources (factor 2 – this study) explained a large portion of ethylene, propene, toluene and C<sub>8</sub> aromatic compound concentrations observed at Ersa during the 2-yr period, in agreement with SOP-1b short-lived anthropogenic factor contributions to those measured in summer 2013. These two factors contributed similarly to their respective VOC total mass observed at the Ersa station (19 and 23% for short-lived anthropogenic sources and the SOP-1b short-lived anthropogenic factor, respectively). Note that some OVOCs contributed significantly to the SOP-1b short-lived anthropogenic factor, such as carboxylic acids and acetone (~ 61% of the factor contribution), enhancing the relative contribution of this factor to the VOC total mass.

Evaporative sources (factor 3 – this study) and the SOP-1b medium-lived anthropogenic factor have chemical profiles marked by C<sub>4</sub>-C<sub>6</sub> alkanes. Nevertheless, a higher portion of i-butane and n-butane concentrations observed at Ersa during the 2-yr period was explained by evaporative sources than those measured in summer 2013 which were attributed to SOP-1b medium-lived anthropogenic factor contributions. The SOP-1b medium-lived anthropogenic factor contributed 12% to VOC summer 2013 concentrations while evaporative source contribution to NMHC concentrations measured during two years was 22%, partly considering their higher contribution in winter (see Sect. 4.2). Evaporative sources and the SOP-1b medium-lived anthropogenic factor were of the same origins, as they showed higher contributions when Ersa received French and European air masses.

The SOP-1b long-lived anthropogenic factor was mainly composed of ethane, acetylene, propane and benzene, in agreement with chemical profiles characterizing long-lived combustion sources (factor 4 – this study) and regional background (factor 5 – this study). Regional background and long-lived combustion sources fully explained ethane and acetylene concentrations, respectively, while the SOP-1b long-lived anthropogenic factor explained only 58% of ethane concentrations and 44% of acetylene concentrations. These findings can suggest that the PMF model applied to the 2-yr NMHC dataset mostly pinpointed distant origins impacting ethane and acetylene concentrations measured at Ersa, which may be related to the temporal coverage and the time resolution of VOC measurements of the 2-yr period. Moreover, the PMF solution of this study allowed to deconvolve long-lived combustion sources, partly attributed to residential heating (Sect. 3.5.4), from the regional background, and to highlight contributions higher for regional background (39% to total mass of selected NMHCs) than for long-lived combustion sources (16%). The high temperature in summer probably induced a limited use of heating systems that could explain why the PMF analysis performed with the SOP-1b VOC dataset did not identify separately these two source categories as well as the relatively low contribution of the SOP-1b long-lived anthropogenic factor to the total VOC mass (16%). Note that winter contributions of regional background and long-lived combustion sources showed different interannual variations during the 2-yr study period (see Sect. 4.2), which may have participated in the deconvolution of these sources by the PMF model. The SOP-1b long-lived anthropogenic factor, long-lived combustion sources and regional background were of the same regional origins as they showed higher contributions especially when Ersa received European air masses.

Nevertheless, the time resolution of VOC measurement of the 2-yr period (see Sect. 2.2.1) and the limited number of sampling days during this study period (Fig. S1) did not help to support the clear deconvolution of the 5 factors composing the PMF solution of this study. Indeed, factors related to anthropogenic sources were quite correlated between them (Pearson correlation factors from 0.1 to 0.8; the highest ones were noticed for sources mainly of regional origins; Sect. 3.5) while SOP-1b anthropogenic sources were not (Pearson correlation factors from -0.5 to 0.1).

Finally, the incorporation of OVOCs in the SOP-1b factorial analysis allowed to identify and characterize two secondary source categories, namely secondary biogenic factor and oxygenated factor. Secondary biogenic factor contributed only 6% to VOC summer 2013 mass and was mainly composed of methyl vinyl ketone, methacrolein, pinonaldehyde and nopinone. These compounds are specific oxidation products of primary biogenic VOCs (isoprene,  $\alpha$ -pinene and  $\beta$ -pinene) which were emitted in the vicinity of the Ersä site (Michoud et al., 2017). Oxygenated factor was mainly composed of carboxylic acids (this factor explained 54, 43 and 28% of formic acid, acetic acid and propionic acid concentrations, respectively), alcohols (e.g. 49% of methanol concentrations) and carbonyl compounds (e.g. 57, 18 and 21% of acetone, acetaldehyde and MEK concentrations, respectively). Most of these species can result from the photochemical oxidation of both anthropogenic and biogenic VOCs. Oxygenated factor was found to be the largest contributor to VOC summer 2013 concentrations observed at Ersä (28% of the total VOC mass). Michoud et al. (2017) concluded that OVOCs monitored at Ersä in summer 2013 were approximately half oxidation products of VOCs and half primary VOCs.

## **Section S6: Examination of a summer 2013 PMF solution realized considering only the NMHCs selected in the factorial analysis of this study**

We modelled a summer 2013 PMF solution composed of 4 factors, as 4 primary sources were identified in Michoud et al. (2017; Sect. S5), considering a subset of NMHC data composed only of 13 variables (those selected for the 2-yr PMF solution of this study, at the exception of n-hexane which was not measured in summer 2013 at a 90-min time resolution). We compared this solution with the PMF solution modelled by Michoud et al. (2017) and results are presented in Figs. S16 and S17. The same species dominantly composed the paired factor profiles of the two PMF solutions (Fig. S16) suggesting that the 13 variables selected for the factorial analysis of this study included key tracers of the primary sources influencing VOC summer 2013 concentrations observed at Ersä. The primary biogenic source of the PMF solution modelled with the VOC subset (factor 4 – Fig. S16) is composed of a lower proportion of anthropogenic NMHCs and a higher isoprene one than the primary biogenic factor modelled by Michoud et al. (2017). NMHCs composing anthropogenic sources in low proportions tend to have been reduced with the 4-factor PMF solution (factors 1-3 – Fig. S16), suggesting a better deconvolution of these sources, at the exception of ethane proportion in the chemical profile of short-lived anthropogenic sources (factor 3) which increased. Concerning factor contribution variations (Fig. S17), medium-lived anthropogenic sources and the primary biogenic source showed the same variability with the two PMF solutions (determination coefficients: 0.85-0.89). Similar results were noticed for long-lived anthropogenic sources (determination coefficient: 0.72), at the exception of the last days of the summer 2013 study period. However, short-lived anthropogenic sources have shown different day-to-day variations as a function of the PMF solution, even if factor contribution variations globally followed the same pattern (Fig. S17). This factor contribution variability seems to be not only influenced by the variations in concentrations of reactive selected NMHCs composing it (Fig. S16) but can be also induced by other species such as ethane (for the factor of the PMF solution modelled with the subset), C<sub>9</sub> aromatics, 2-methylfuran and OVOCs (carboxylic acids, acetone, isopropanol and n-hexanal; for the factor of the PMF solution modelled by Michoud et al., 2017). Note that formic acid, acetic acid, and acetone concentrations corresponded to 42% of the measured VOC concentrations selected in the factorial analysis of Michoud et al. (2017).

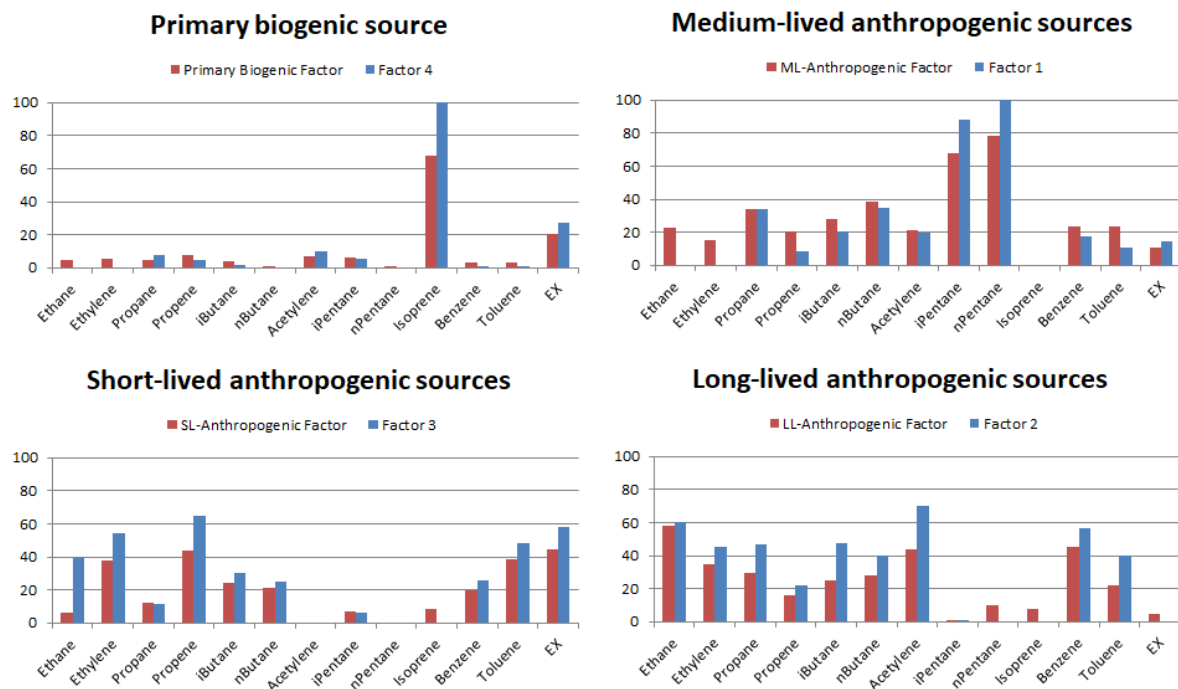

**Figure S16: Chemical profiles (percent of each species apportioned to each factor - %) of the 4-factor PMF solution (13 variables; blue bars) compared to a selection of VOCs composing chemical profiles of the 4 primary sources identified in Michoud et al. (2017) owing to a 6-factor PMF solution (42 variables; red bars).**

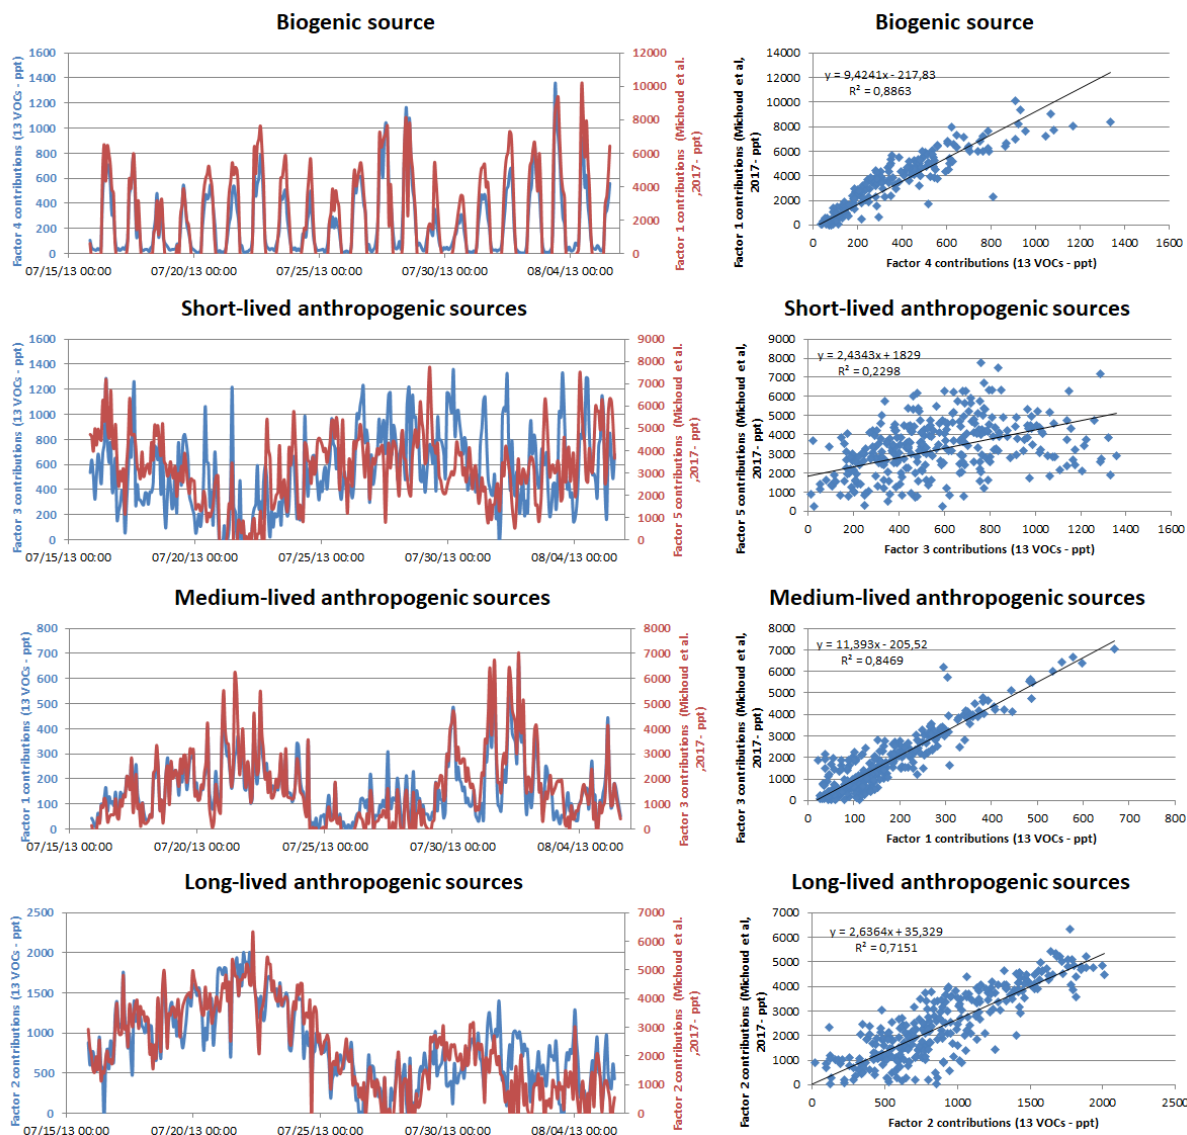

**Figure S17: Times series (on the left) and scatter plots (on the right) of contributions (in ppt) of factors composing the 4-factor PMF solution (13 variables; blue lines) compared to the 4 primary sources identified in Michoud et al. (2017) owing to a 6-factor PMF solution (42 variables; red lines).**

## **Section S7: Concurrent NMHC measurements performed at other European background monitoring stations**

From June 2012 to June 2014, NMHC measurements were concurrently conducted at 17 other European background monitoring stations. These European stations are part of EMEP and GAW networks. Figure S18 shows their geographical distribution. They cover a large part of western and central Europe from Corsica Island in the south to northern Scandinavia in the north, they are located at different altitudes (up to 3580 m a.s.l.) and most of them are categorized as GAW ‘regional stations for Europe’. More information on these stations can be found on EMEP (<https://www.nilu.no/projects/ccc/sitedescriptions/index.html>, last access: 11/10/2020) or GAW station information system ([https://gawsis.meteoswiss.ch/GAWSIS//index.html#/,](https://gawsis.meteoswiss.ch/GAWSIS//index.html#/) last access: 11/10/2020) websites. NMHC measurements were realized by different on-line (GC or proton-transfer-reaction mass spectrometer - PTR-MS) or off-line techniques (VOCs collected by steel canisters) and were reported to the EMEP EBAS database (<http://ebas.nilu.no/Default.aspx>, last access: 11/10/2020).

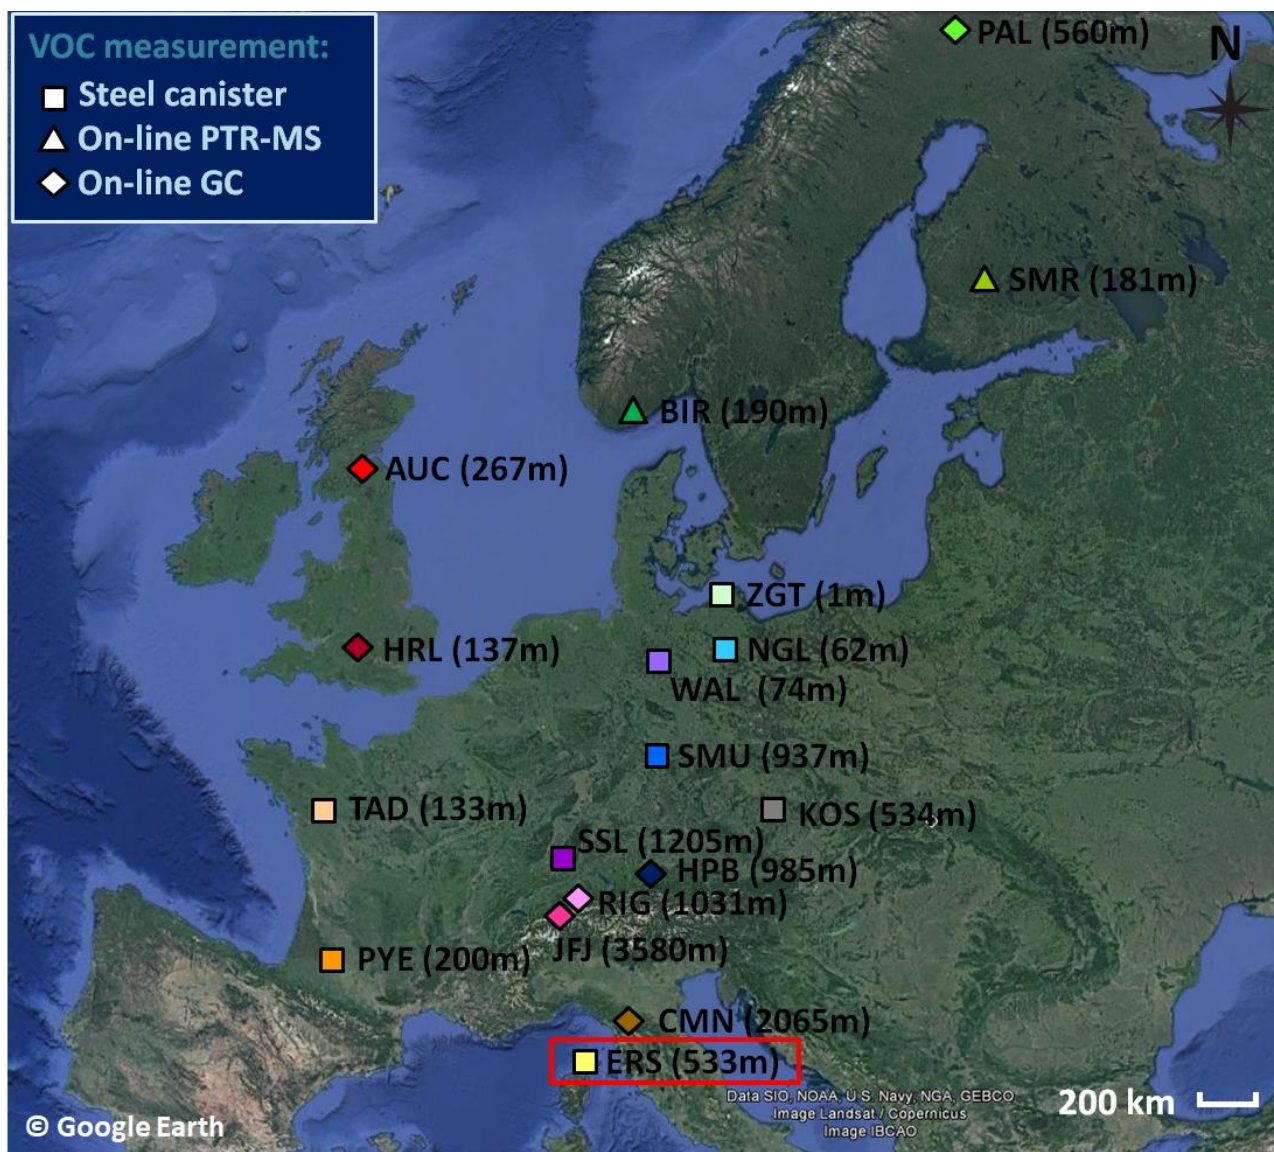

Figure S18: Locations of 18 European monitoring stations where NMHC measurements were conducted from June 2012 to June 2014. These stations are part of EMEP/GAW networks. They are characterized by their GAW identification and the altitudes are given within brackets in reference to standard sea level. AUC, BIR, ERS, KOS, NGL, PYE, RIG, SMR, SSL and TAD stations are categorized as GAW ‘regional stations for Europe’. CMN, HPB, JFJ and PAL stations are categorized as GAW ‘global stations’. AHRL, SMU, WAL and ZGT stations are considered as GAW ‘other elements stations in Europe’, more precisely, ZGT is a ‘coastal station’ while HRL, SMU and WAL are ‘rural stations’. Note that high-altitude stations such as CMN and HPB stations could be frequently in free-tropospheric conditions. The Erska site (GAW identification: ERS) is underlined in red. Square markers indicate that VOCs were collected by steel canisters and analysed thereafter at laboratories (i.e. off-line measurements). Triangle and diamond markers indicate that VOC measurements were conducted in-situ using PTR-MS or GC analysers, respectively. NMap provided by Google Earth Pro software (v.7.3.3 image Landsat/Copernicus – IBCAO; data SIO, NOAA, U.S. Navy, NGA, GEBCO; © Google Earth).

## References

- Brown, S. G., Eberly, S., Paatero, P., and Norris, G. A.: Methods for estimating uncertainty in PMF solutions: Examples with ambient air, and water quality data, and guidance on reporting PMF results, *Sci. Total Environ.*, 518–519, 626–635, doi:10.1016/j.scitotenv.2015.01.022, 2015.
- 5 Debevec, C., Sauvage, S., Gros, V., Sciare, J., Pikridas, M., Stavroulas, I., Salameh, T., Leonardis, T., Gaudion, V., Depelchin, L., Fronval, I., Sarda-Esteve, R., Baisnée, D., Bonsang, B., Savvides, C., Vrekoussis, M., and Locoge, N.: Origin, and variability in volatile organic compounds observed at an Eastern Mediterranean background site (Cyprus), *Atmos. Chem. Phys.*, 17, 11355–11388, doi:10.5194/acp-17-11355-2017, 2017.
- 10 Detournay, A., Sauvage, S., Locoge, N., Gaudion, V., Leonardis, T., Fronval, I., Kaluzny, P., and Galloo, J. C.: Development of a sampling method for the simultaneous monitoring of straight-chain alkanes, straight-chain saturated carbonyl compounds, and monoterpenes in remote areas, *J. Environ. Monit.*, 13, 983–990, doi:10.1039/c0em00354a, 2011.
- Detournay, A., Sauvage, S., Riffault, V., Wroblewski, A., and Locoge, N.: Source, and behavior of isoprenoid compounds at a southern France remote site, *Atmos. Environ.*, 77, 272–282, doi:10.1016/j.atmosenv.2013.03.041, 2013.
- 15 Kalogridis, A.: Caractérisation des composés organiques volatils en région méditerranéenne, Université Paris Sud - Paris XI, available at: <https://tel.archives-ouvertes.fr/tel-01165005> (last access: 14 June 2020), 2014.
- Michoud, V., Sciare, J., Sauvage, S., Dusanter, S., Léonardis, T., Gros, V., Kalogridis, C., Zannoni, N., Féron, A., Petit, J. E., Crenn, V., Baisnée, D., Sarda-Estève, R., Bonnair, N., Marchand, N., Dewitt, H. L., Pey, J., Colomb, A., Gheusi, F., Szidat, S., Stavroulas, I., Borbon, A., and Locoge, N.: Organic carbon at a remote site of the western Mediterranean Basin: Sources, and chemistry during the ChArMEX SOP2 field experiment, *Atmos. Chem. Phys.*, 17, 8837–8865, doi:10.5194/acp-17-8837-2017, 2017.
- 20 Norris, G., Duvall, R., Brown, S., and Bai, S.: EPA Positive Matrix Factorization (PMF) 5.0 Fundamentals, and User Guide Prepared for the US Environmental Protection Agency Office of Research, and Development, Washington, DC. [online] Available from: [https://www.epa.gov/sites/production/files/2015-02/documents/pmf\\_5.0\\_user\\_guide.pdf](https://www.epa.gov/sites/production/files/2015-02/documents/pmf_5.0_user_guide.pdf) (last access: 11 October 2020), 2014.
- 25 Paatero, P.: Least squares formulation of robust non-negative factor analysis, *Chemom. Intell. Lab. Syst.*, 37, 23–35, doi:10.1016/S0169-7439(96)00044-5, 1997.
- Paatero, P., and Tapper, U.: Positive matrix factorization: A non-negative factor model with optimal utilization of error estimates of data values, *Environmetrics*, 5, 111–126, doi:10.1002/env.3170050203, 1994.
- Paatero, P., Eberly, S., Brown, S. G., and Norris, G. A.: Methods for estimating uncertainty in factor analytic solutions, *Atmos. Meas. Tech.*, 7, 781–797, doi:10.5194/amt-7-781-2014, 2014.
- 30 Paatero, P., Hopke, P. K., Song, X. H., and Ramadan, Z.: Understanding, and controlling rotations in factor analytic models, *Chemom. Intell. Lab. Syst.*, 60, 253–264, doi:10.1016/S0169-7439(01)00200-3, 2002.
- Paatero, P., Hopke, P. K., Begum, B. A., and Biswas, S. K.: A graphical diagnostic method for assessing the rotation in factor analytical models of atmospheric pollution, *Atmos. Environ.*, 39, 193–201, doi:10.1016/j.atmosenv.2004.08.018, 2005.
- 35 Polissar, A. V., Hopke, P. K., Paatero, P., Malm, W. C., and Sisler, J. F.: Atmospheric aerosol over Alaska 2. Elemental composition, and sources, *J. Geophys. Res. Atmos.*, 103, 19045–19057, doi:10.1029/98JD01212, 1998.
- Sauvage, S., Plaisance, H., Locoge, N., Wroblewski, A., Coddeville, P., and Galloo, J. C.: Long term measurement, and source apportionment of non-methane hydrocarbons in three French rural areas, *Atmos. Environ.*, 43, 2430–2441, doi:10.1016/j.atmosenv.2009.02.001, 2009.
- 40 Seibert, P., Kromp-Kolb, H., Baltensperger, U., Jost, D. T., and Schwikowski, M.: Trajectory analysis of high-alpine air pollution data, in *Air Pollution Modeling, and Its Application X, NATO · Challenges of Modern Society*, vol. 18, edited by S.-E. Gryning, and M. M. Millán, 595–596, Springer, Boston, MA., [https://doi.org/10.1007/978-1-4615-1817-4\\_65](https://doi.org/10.1007/978-1-4615-1817-4_65), 1994.
